# Supplementary material for: A Systematic Review of Methods, Study Quality, and Results of Economic Evaluation for Childhood and Adolescent Obesity Intervention
Source: Int J Environ Res Public Health. 2019 Feb 8;16(3):485. doi: 10.3390/ijerph16030485 (PMC6388206; doi:10.3390/ijerph16030485)
Supplement: Supplementary file 1 [file ijerph-16-00485-s001.pdf]

A systematic review of methods, study quality, and results of economic evaluation for childhood and adolescent obesity intervention

Mandana Zanganeh, Peymane Adab, Bai Li and Emma Frew

## **Supplementary materials**

**Section A:** Completed PRISMA checklist

**Section B:** Search strategy

**Tables S1 (i) – S1 (iv):** Data extraction (Details about study context)

**Tables S2-4 (i) – S2-4 (iv):** Data extraction (Detailed account of the economic evaluation methods)

**Table S5:** Drummond checklist for critically appraising relevant studies

**Tables S6 (i) – S6 (iv):** Quality assessment of the included studies

## Section A: Completed PRISMA checklist

| Section/topic             | #  | Checklist item                                                                                                                                                                                                                                                                                              | Reported on page #                 |
|---------------------------|----|-------------------------------------------------------------------------------------------------------------------------------------------------------------------------------------------------------------------------------------------------------------------------------------------------------------|------------------------------------|
| <b>TITLE</b>              |    |                                                                                                                                                                                                                                                                                                             |                                    |
| Title                     | 1  | Identify the report as a systematic review, meta-analysis, or both.                                                                                                                                                                                                                                         | 1                                  |
| <b>ABSTRACT</b>           |    |                                                                                                                                                                                                                                                                                                             |                                    |
| Structured summary        | 2  | Provide a structured summary including, as applicable: background; objectives; data sources; study eligibility criteria, participants, and interventions; study appraisal and synthesis methods; results; limitations; conclusions and implications of key findings; systematic review registration number. | 1-2                                |
| <b>INTRODUCTION</b>       |    |                                                                                                                                                                                                                                                                                                             |                                    |
| Rationale                 | 3  | Describe the rationale for the review in the context of what is already known.                                                                                                                                                                                                                              | 3-4                                |
| Objectives                | 4  | Provide an explicit statement of questions being addressed with reference to participants, interventions, comparisons, outcomes, and study design (PICOS).                                                                                                                                                  | 4                                  |
| <b>METHODS</b>            |    |                                                                                                                                                                                                                                                                                                             |                                    |
| Protocol and registration | 5  | Indicate if a review protocol exists, if and where it can be accessed (e.g., Web address), and, if available, provide registration information including registration number.                                                                                                                               | 4                                  |
| Eligibility criteria      | 6  | Specify study characteristics (e.g., PICOS, length of follow-up) and report characteristics (e.g., years considered, language, publication status) used as criteria for eligibility, giving rationale.                                                                                                      | 5-6                                |
| Information sources       | 7  | Describe all information sources (e.g., databases with dates of coverage, contact with study authors to identify additional studies) in the search and date last searched.                                                                                                                                  | 4-5                                |
| Search                    | 8  | Present full electronic search strategy for at least one database, including any limits used, such that it could be repeated.                                                                                                                                                                               | Supplementary material (Section B) |
| Study selection           | 9  | State the process for selecting studies (i.e., screening, eligibility, included in systematic review, and, if applicable, included in the meta-analysis).                                                                                                                                                   | 6                                  |
| Data collection process   | 10 | Describe method of data extraction from reports (e.g., piloted forms, independently, in duplicate) and any processes for obtaining and confirming data from investigators.                                                                                                                                  | 6                                  |

|                                    |    |                                                                                                                                                                                                                        |                                                                            |
|------------------------------------|----|------------------------------------------------------------------------------------------------------------------------------------------------------------------------------------------------------------------------|----------------------------------------------------------------------------|
| Data items                         | 11 | List and define all variables for which data were sought (e.g., PICOS, funding sources) and any assumptions and simplifications made.                                                                                  | 4-6                                                                        |
| Risk of bias in individual studies | 12 | Describe methods used for assessing risk of bias of individual studies (including specification of whether this was done at the study or outcome level), and how this information is to be used in any data synthesis. | N/A                                                                        |
| Summary measures                   | 13 | State the principal summary measures (e.g., risk ratio, difference in means).                                                                                                                                          | N/A                                                                        |
| Synthesis of results               | 14 | Describe the methods of handling data and combining results of studies, if done, including measures of consistency (e.g., $I^2$ ) for each meta-analysis.                                                              | 6-7                                                                        |
| Risk of bias across studies        | 15 | Specify any assessment of risk of bias that may affect the cumulative evidence (e.g., publication bias, selective reporting within studies).                                                                           | N/A                                                                        |
| Additional analyses                | 16 | Describe methods of additional analyses (e.g., sensitivity or subgroup analyses, meta-regression), if done, indicating which were pre-specified.                                                                       | N/A                                                                        |
| <b>RESULTS</b>                     |    |                                                                                                                                                                                                                        |                                                                            |
| Study selection                    | 17 | Give numbers of studies screened, assessed for eligibility, and included in the review, with reasons for exclusions at each stage, ideally with a flow diagram.                                                        | 7                                                                          |
| Study characteristics              | 18 | For each study, present characteristics for which data were extracted (e.g., study size, PICOS, follow-up period) and provide the citations.                                                                           | 7-10+<br>Supplementary material<br>( <b>Tables S1 (i) – S1 (iv)</b> )      |
| Risk of bias within studies        | 19 | Present data on risk of bias of each study and, if available, any outcome level assessment (see item 12).                                                                                                              | N/A                                                                        |
| Results of individual studies      | 20 | For all outcomes considered (benefits or harms), present, for each study: (a) simple summary data for each intervention group (b) effect estimates and confidence intervals, ideally with a forest plot.               | 7-10+<br>Supplementary material<br>( <b>Tables S1 (i) – S1 (iv)</b> )      |
| Synthesis of results               | 21 | Present results of each meta-analysis done, including confidence intervals and measures of consistency.                                                                                                                | 10-14+<br>Supplementary material<br>( <b>Tables S2-4 (i) – S2-4 (iv)</b> ) |

|                             |    |                                                                                                                                                                                      |       |
|-----------------------------|----|--------------------------------------------------------------------------------------------------------------------------------------------------------------------------------------|-------|
| Risk of bias across studies | 22 | Present results of any assessment of risk of bias across studies (see Item 15).                                                                                                      | N/A   |
| Additional analysis         | 23 | Give results of additional analyses, if done (e.g., sensitivity or subgroup analyses, meta-regression [see Item 16]).                                                                | N/A   |
| <b>DISCUSSION</b>           |    |                                                                                                                                                                                      |       |
| Summary of evidence         | 24 | Summarize the main findings including the strength of evidence for each main outcome; consider their relevance to key groups (e.g., healthcare providers, users, and policy makers). | 14-16 |
| Limitations                 | 25 | Discuss limitations at study and outcome level (e.g., risk of bias), and at review-level (e.g., incomplete retrieval of identified research, reporting bias).                        | 16    |
| Conclusions                 | 26 | Provide a general interpretation of the results in the context of other evidence, and implications for future research.                                                              | 16    |
| <b>FUNDING</b>              |    |                                                                                                                                                                                      |       |
| Funding                     | 27 | Describe sources of funding for the systematic review and other support (e.g., supply of data); role of funders for the systematic review.                                           | 17    |

*From:* Liberati A, Altman DG, Tetzlaff J, et al. The PRISMA statement for reporting systematic reviews and meta-analyses of studies that evaluate health care interventions: explanation and elaboration. PLoS Medicine. 2009;6(7):e1000100

For more information, visit: [www.prisma-statement.org](http://www.prisma-statement.org)

## Section B: Search strategy

### MEDLINE (Ovid)

1. exp Obesity/
2. Obese.mp.
3. exp Overweight/
4. (BMI or body mass index).af.
5. Weight gain/
6. (Overweight or over weight or obesity or adipose).af.
7. exp Child/
8. exp Infant/
9. (Child\* or adolescen\* or infant\*).af.
10. Schoolchild\*.mp.
11. exp Adolescent/
12. (Boys or girls or youth or youths).af.
13. (Teenage\* or young person).af.
14. (Nutrition adj2 intervent\*).af.
15. (Obesity adj2 prevent\* or treat\*).af.
16. Counsel?ing.mp.
17. exp support groups/
18. exp Health Behaviour.mp.
19. exp Life Style/
20. exp Delivery of Health Care/
21. exp Social Support/
22. exp Family Practice/
23. exp Parent-Child Relations/
24. Food Habits .mp.
25. exp Diet therapy/
26. exp Food Preferences/
27. exp Exercise therapy/
28. Physical activit\*.mp.
29. Economic Evaluat\*.mp.
30. Cost\*.ti.
31. Cost?Benefit\*.mp.
32. Cost?Utilit\*.mp.
33. Cost?Effective\*.mp.
34. exp "costs and cost analysis"/
35. 1 or 2 or 3 or 4 or 5 or 6
36. 7 or 8 or 9 or 10 or 11 or 12 or 13
37. 14 or 15 or 16 or 17 or 18 or 19 or 20 or 21 or 22 or 23 or 24 or 25 or 26 or 27 or 28
38. 29 or 30 or 31 or 32 or 33 or 34
39. 35 and 36 and 37 and 38
40. Limit 39 to (yr="2001-Current")

### EMBASE (Ovid)

1. exp Obesity/
2. Obese.mp.
3. exp Overweight/
4. (BMI or body mass index).af.
5. Weight gain/
6. (Overweight or over weight or obesity or adipose).af.

7. exp Child/
8. exp Infant/
9. (Child\* or adolescen\* or infant\*).af.
10. Schoolchild\*.mp.
11. exp Adolescent/
12. (Boys or girls or youth or youths).af.
13. (Teenage\* or young person).af.
14. (Nutrition adj2 intervent\*).af.
15. (Obesity adj2 prevent\* or treat\*).af.
16. Counsel?ing.mp.
17. exp support groups/
18. exp Health Behaviour.mp.
19. exp Life Style/
20. exp Delivery of Health Care/
21. exp Social Support/
22. exp Family Practice/
23. exp Parent-Child Relations/
24. Food Habits .mp.
25. exp Diet therapy/
26. exp Food Preferences/
27. exp Exercise therapy/
28. Physical activit\*.mp.
29. Economic Evaluat\*.mp.
30. Cost\*.ti.
31. Cost?Benefit\*.mp.
32. Cost?Utilit\*.mp.
33. Cost?Effective\*.mp.
34. exp "costs and cost analysis"/
35. 1 or 2 or 3 or 4 or 5 or 6
36. 7 or 8 or 9 or 10 or 11 or 12 or 13
37. 14 or 15 or 16 or 17 or 18 or 19 or 20 or 21 or 22 or 23 or 24 or 25 or 26 or 27 or 28
38. 29 or 30 or 31 or 32 or 33 or 34
39. 35 and 36 and 37 and 38
40. Limit 39 to (yr="2001-Current")

## PsycINFO

1. exp Obesity/
2. Obese.mp.
3. exp Overweight/
4. (BMI or body mass index).af.
5. Weight gain/
6. (Overweight or over weight or obesity or adipose).af.
7. exp Child/
8. exp Infant/
9. (Child\* or adolescen\* or infant\*).af.
10. Schoolchild\*.mp.
11. exp Adolescent/
12. (Boys or girls or youth or youths).af.
13. (Teenage\* or young person).af.
14. (Nutrition adj2 intervent\*).af.
15. (Obesity adj2 prevent\* or treat\*).af.
16. Counsel?ing.mp.

17. exp support groups/
18. exp Health Behaviour.mp.
19. exp Life Style/
20. exp Delivery of Health Care/
21. exp Social Support/
22. exp Family Practice/
23. exp Parent-Child Relations/
24. Food Habits .mp.
25. exp Diet therapy/
26. exp Food Preferences/
27. exp Exercise therapy/
28. Physical activit\*.mp.
29. Economic Evaluat\*.mp.
30. Cost\*.ti.
31. Cost?Benefit\*.mp.
32. Cost?Utilit\*.mp.
33. Cost?Effective\*.mp.
34. exp "costs and cost analysis"/
35. 1 or 2 or 3 or 4 or 5 or 6
36. 7 or 8 or 9 or 10 or 11 or 12 or 13
37. 14 or 15 or 16 or 17 or 18 or 19 or 20 or 21 or 22 or 23 or 24 or 25 or 26 or 27 or 28
38. 29 or 30 or 31 or 32 or 33 or 34
39. 35 and 36 and 37 and 38
40. Limit 39 to (yr="2001-Current")

### Web of Science

1. TS= (Obesity OR obese OR overweight)
2. TS= (Child OR infant OR schoolchild\* OR adolescent)
3. TS= (Interven\* OR prevent\* OR therapeutics OR counseling OR "primary health care" OR "preventive health services" OR "health behaviour" OR "life style" OR "health knowledge, practice, attitudes" OR "delivery of health care" OR "social support" OR "family practice" OR "parent-child relations" OR "food habits" OR "food preferences" OR exercise OR sports)
4. TS= ("Economic evaluat\*" OR costs\* OR "cost?benefit\*" OR "cost?utilit\*" OR "cost?effective\*")
5. #1 AND #2 AND #3 AND #4 Timespan 2001-2017

### CINAHL Plus

- S1. (MH "Obesity+")
- S2. "obese"
- S3. "overweight"
- S4. (MH "Child+")
- S5. (MH "Infant+")
- S6. "schoolchild\*"
- S7. "adolescent"
- S8. "Interven\*"
- S9. "prevent\*"
- S10. (MH "Therapeutics+")
- S11. "counseling"
- S12. (MH "Primary Health Care")
- S13. "preventive health services"
- S14. (MH "Health Behavior")

S15. (MH "Life Style+")  
 S16. "health knowledge, practice, attitudes"  
 S17. "delivery of health care"  
 S18. "social support"  
 S19. (MH "Family Practice")  
 S20. (MH "Parent-Child Relations")  
 S21. (MH "Food Habits")  
 S22. (MH "Food Preferences")  
 S23. (MH "Exercise+")  
 S24. (MH "Sports+")  
 S25. "Economic evaluat\*"  
 S26. "costs\*"  
 S27. "cost?benefit\*"  
 S28. "cost?utilit\*"  
 S29. "cost?effective\*"  
 S30. S1 OR S2 OR S3  
 S31. S4 OR S5 OR S6 OR S7  
 S32. S8 OR S9 OR S10 OR S11 OR S12 OR S13 OR S14 OR S15 OR S16 OR S17 OR S18 OR S19  
 OR S20 OR S21 OR S22 OR S23 OR S24  
 S33. S25 OR S26 OR S27 OR S28 OR S29  
 S34. S30 AND S31 AND S32 AND S33  
 S35. Limit S34 to Publication Year: 2001-2017

#### **EconLit**

S1. (MH "Obesity+")  
 S2. "obese"  
 S3. "overweight"  
 S4. (MH "Child+")  
 S5. (MH "Infant+")  
 S6. "schoolchild\*"  
 S7. "adolescent"  
 S8. "Interven\*"  
 S9. "prevent\*"  
 S10. (MH "Therapeutics+")  
 S11. "counseling"  
 S12. (MH "Primary Health Care")  
 S13. "preventive health services"  
 S14. (MH "Health Behavior")  
 S15. (MH "Life Style+")  
 S16. "health knowledge, practice, attitudes"  
 S17. "delivery of health care"  
 S18. "social support"  
 S19. (MH "Family Practice")  
 S20. (MH "Parent-Child Relations")  
 S21. (MH "Food Habits")  
 S22. (MH "Food Preferences")  
 S23. (MH "Exercise+")  
 S24. (MH "Sports+")  
 S25. "Economic evaluat\*"  
 S26. "costs\*"  
 S27. "cost?benefit\*"  
 S28. "cost?utilit\*"

- S29. "cost?effective\*"
- S30. S1 OR S2 OR S3
- S31. S4 OR S5 OR S6 OR S7
- S32. S8 OR S9 OR S10 OR S11 OR S12 OR S13 OR S14 OR S15 OR S16 OR S17 OR S18 OR S19  
OR S20 OR S21 OR S22 OR S23 OR S24
- S33. S25 OR S26 OR S27 OR S28 OR S29
- S34. S30 AND S31 AND S32 AND S33
- S35. Limit S34 to Publication Year: 2001-2017

### **CRD (DARE, NHS EED, HTA)**

- 1. MeSH DESCRIPTOR Obesity EXPLODE ALL TREES
- 2. (Obese) OR (Overweight): any field
- 3. MeSH DESCRIPTOR Child EXPLODE ALL TREES
- 4. MeSH DESCRIPTOR Infant EXPLODE ALL TREES
- 5. (Schoolchild\*): any field
- 6. MeSH DESCRIPTOR Adolescent EXPLODE ALL TREES
- 7. (Interven\*) OR (prevent\*): any field
- 8. MeSH DESCRIPTOR Therapeutics EXPLODE ALL TREES
- 9. MeSH DESCRIPTOR Counseling EXPLODE ALL TREES
- 10. MeSH DESCRIPTOR Primary Health Care EXPLODE ALL TREES
- 11. MeSH DESCRIPTOR Preventive Health Services EXPLODE ALL TREES
- 12. MeSH DESCRIPTOR Health Behavior EXPLODE ALL TREES
- 13. MeSH DESCRIPTOR Life Style EXPLODE ALL TREES
- 14. (Health knowledge, practice, attitudes): any field
- 15. MeSH DESCRIPTOR Delivery of Health Care EXPLODE ALL TREES
- 16. MeSH DESCRIPTOR Social Support EXPLODE ALL TREES
- 17. MeSH DESCRIPTOR Family Practice EXPLODE ALL TREES
- 18. MeSH DESCRIPTOR Parent-Child Relations EXPLODE ALL TREES
- 19. (Food Habits): any field
- 20. MeSH DESCRIPTOR Food Preferences EXPLODE ALL TREES
- 21. MeSH DESCRIPTOR Exercise EXPLODE ALL TREES
- 22. MeSH DESCRIPTOR Sports EXPLODE ALL TREES
- 23. MeSH DESCRIPTOR Costs and Cost Analysis EXPLODE ALL TREES
- 24. MeSH DESCRIPTOR Economics EXPLODE ALL TREES
- 25. (Cost) OR (Economic): any field
- 26. (#1 or #2) and (#3 or #4 or #5 or #6) and (#7 or #8 or #9 or #10 or #11 or #12 or #13 or #14 or  
#15 or #16 or #17 or #18 or #19 or #20 or #21 or #22) and (#23 or #24 or #25) From 2001-2017

### **CENTRAL and CDSR**

- 1. "MeSH descriptor: [Obesity] explode all trees
- 2. Obese or overweight: ti, ab.kw (Word variations have been searched)
- 3. "MeSH descriptor: [Child] explode all trees
- 4. "MeSH descriptor: [Infant] explode all trees
- 5. Schoolchild\*: ti, ab.kw (Word variations have been searched)
- 6. "MeSH descriptor: [Adolescent] explode all trees
- 7. Interven\* or prevent\*: ti, ab.kw (Word variations have been searched)
- 8. "MeSH descriptor: [Therapeutics] explode all trees
- 9. "MeSH descriptor: [Counseling] explode all trees
- 10. "MeSH descriptor: [Primary Health Care] explode all trees
- 11. "MeSH descriptor: [Preventive Health Services] explode all trees

12. "MeSH descriptor: [Health Behavior] explode all trees
13. "MeSH descriptor: [Life Style] explode all trees
14. Health knowledge, practice, attitudes: ti, ab.kw (Word variations have been searched)
15. "MeSH descriptor: [Delivery of Health Care] explode all trees
16. "MeSH descriptor: [Social Support] explode all trees
17. "MeSH descriptor: [Family Practice] explode all trees
18. "MeSH descriptor: [Parent-Child Relations] explode all trees
19. "MeSH descriptor: [Food Habits] explode all trees
20. "MeSH descriptor: [Food Preferences] explode all trees
21. "MeSH descriptor: [Exercise] explode all trees
22. "MeSH descriptor: [Sports] explode all trees
23. "MeSH descriptor: [Costs and Cost Analysis] explode all trees
24. "MeSH descriptor: [Economics] explode all trees
25. Cost or economic: ti, ab.kw (Word variations have been searched)
26. (#1 or #2) and (#3 or #4 or #5 or #6) and (#7 or #8 or #9 or #10 or #11 or #12 or #13 or #14 or #15 or #16 or #17 or #18 or #19 or #20 or #21 or #22) and (#23 or #24 or #25) From 2001-2017, in other reviews or economic evaluations

**Tables S1 (i) – S1 (iv):** Data extraction (Details about study context)

**Table S1 (i)** Details about study context (trial-based prevention studies) (alphabetically sorted)

| Authors         | Year | Country     | Study design | Setting          | Target population/ age group                            | N (analytical sample)    | Parents/ guardians included                        | Intervention overview /target                                                                    | Intervention aim /mode of delivery | Comparator                                            |
|-----------------|------|-------------|--------------|------------------|---------------------------------------------------------|--------------------------|----------------------------------------------------|--------------------------------------------------------------------------------------------------|------------------------------------|-------------------------------------------------------|
| Hayes et al.    | 2014 | Australia   | RCT          | Home             | Up to age 2 years, boys/girls from a mixed-weight group | 324 parents with infants | Yes: Not for indirect and direct non-medical costs | 8 one-to-one consultations with education and advice on feeding, nutrition and physical activity | Prevention /nurse                  | Usual care, plus home safety information sent by mail |
| Keszyus et al.  | 2011 | Germany     | RCT          | School           | 7-8 years, boys/girls from a mixed-weight group         | 945 children             | Yes: parents involved but not costed               | 28 units, health education, physical activity breaks                                             | Prevention /teacher                | Usual care                                            |
| Krauth et al.   | 2013 | Germany     | Cohort       | School           | 6-10 years, boys/girls from a mixed-weight group        | 660 children             | Yes                                                | 3 additional lessons per week regarding physical activity                                        | Prevention /teacher                | Usual care                                            |
| Martinez et al. | 2011 | Spain       | RCT          | School           | 9-10 years, boys/girls from a mixed-weight group        | 1,409 children           | Yes: parents involved but not costed               | 3 sessions, school-based physical activity program                                               | Prevention /teacher                | Usual care                                            |
| McAuley et al.  | 2010 | New Zealand | RCT          | School-community | 5–12 years, boys/girls from a mixed-weight group        | 279 children             | Yes: parents involved but not costed               | A pilot program for nutrition and physical activity                                              | Prevention /activity coordinator   | Usual care                                            |

**Table S1 (i)** Details about study context (trial-based prevention studies) (alphabetically sorted) continued

|                   |      |           |                 |                      |                                                   |                   |                                                    |                                                                                                                                 |                             |            |
|-------------------|------|-----------|-----------------|----------------------|---------------------------------------------------|-------------------|----------------------------------------------------|---------------------------------------------------------------------------------------------------------------------------------|-----------------------------|------------|
| Meng et al.       | 2013 | China     | RCT             | School               | 6-13 years, boys/girls from a mixed-weight group  | 8, 301 children   | Yes: parents involved but not costed               | 6 times, nutrition education for children, parents and teachers, physical activity intervention and comprehensive intervention. | Prevention /teacher         | Usual care |
| Peterson et al.   | 2008 | USA       | Cross-sectional | State                | 12–18 years, boys/girls from a mixed-weight group | 3,782 adolescents | No                                                 | The get up and do something media campaign (Television and/or billboards) for physical activity                                 | Prevention (policy) /media  | Usual care |
| Sutherland et al. | 2016 | Australia | RCT             | School-community     | 13-16 years, boys/girls from a mixed-weight group | 1,150 adolescents | Yes: Not for indirect and direct non-medical costs | Seven physical activity promotion strategies and six additional strategies                                                      | Prevention /trained teacher | Usual care |
| Wang et al.       | 2008 | USA       | RCT             | School (after hours) | 6-10 years, boys/girls from a mixed-weight group  | 182 children      | Yes                                                | After school environment program: physical activity, healthy snacks                                                             | Prevention /coordinator     | Usual care |

Notes: RCT = randomised controlled trial

**Table S1 (ii)** Details about study context (trial-based treatment studies) (alphabetically sorted)

| Authors              | Year | Country | Study design | Setting                            | Target population/<br>age group                    | N<br>(analytical sample)     | Parents/<br>guardians included                     | Intervention overview<br>/target                                                                                                                              | Intervention aim<br>/mode of delivery                    | Comparator                                                                                    |
|----------------------|------|---------|--------------|------------------------------------|----------------------------------------------------|------------------------------|----------------------------------------------------|---------------------------------------------------------------------------------------------------------------------------------------------------------------|----------------------------------------------------------|-----------------------------------------------------------------------------------------------|
| Epstein et al.       | 2014 | USA     | RCT          | Primary care                       | 8-12 years, boys/girls with obesity/overweight     | 50 children with parents     | Yes                                                | Family-based behavioural treatment, 15 sessions (12 weekly, 2 biweekly and 1 monthly): diet, physical activity and behaviour change for both treatment groups | Treatment /staff                                         | Separate group treatment (parent and child)                                                   |
| Goldfield et al.     | 2001 | Canada  | RCT          | Primary care                       | 8-12 years, boys/girls with obesity                | 24 children with parents     | Yes: Not for indirect and direct non-medical costs | Group treatment, 13 sessions (8 weekly, 4 bi-weekly, and 1 monthly): diet, physical activity and behaviour change for both treatment groups                   | Treatment /counselling degree                            | Mixed family-based behavioural treatment                                                      |
| Hollingshurst et al. | 2013 | UK      | RCT          | Primary care/<br>home/<br>hospital | 5-16 years and 9-17 years, boys/girls with obesity | 143 children and adolescents | Yes: Parents involved but not costed               | Every 3 months, nurse-led, input from dietitian and exercise specialist and an intensive intervention Mandometer                                              | Treatment /doctor, nurse, exercise specialist, dietitian | Hospital, Consultant-led care with discretionary input from dietitian and exercise specialist |

**Table S1 (ii)** Details about study context (trial-based treatment studies) (alphabetically sorted) continued

|                   |      |           |     |                  |                                                |                                      |                                                       |                                                                                                                                     |                                                                                    |                                                                      |
|-------------------|------|-----------|-----|------------------|------------------------------------------------|--------------------------------------|-------------------------------------------------------|-------------------------------------------------------------------------------------------------------------------------------------|------------------------------------------------------------------------------------|----------------------------------------------------------------------|
| Janicke et al.    | 2009 | USA       | RCT | Community        | 8-14 years, boys/girls with obesity/overweight | 76 children                          | Yes:<br>Not for indirect and direct non-medical costs | Parent only behavioural intervention, group sessions: weekly: 8, bi-weekly: 4/ diet and physical activity for both treatment groups | Treatment /post-doctoral psychologist and graduate students in clinical psychology | Family-based behavioural intervention,                               |
| Kalavainen et al. | 2009 | Finland   | RCT | Primary care     | 7–9 years, boys/girls with obesity             | 70 children with parents             | Yes:<br>Not for indirect and direct non-medical costs | Routine counselling treatment, 2 appointments for children: diet                                                                    | Treatment /nurses, nutritionists                                                   | Group treatment, 15 separate sessions for parents and children: diet |
| Robertson et al.  | 2017 | UK        | RCT | NHS primary care | 6-11 years, boys/girls with obesity/overweight | 128 children with 137 parents/carers | Yes                                                   | 1 per week, parenting skills, social and emotional development/ physical activity and diet                                          | Treatment /intervention team                                                       | Usual care                                                           |
| Wake et al.       | 2008 | Australia | RCT | Primary care     | 5–9 years, boys/girls with obesity/overweight  | 163 children with parents            | Yes                                                   | Training of GP (3 times 2.5 h), 4 consultations over a 12-week period/physical activity, diet                                       | Treatment /GP                                                                      | Usual care                                                           |

Notes: GP = general practitioner; RCT = randomised controlled trial

**Table S1 (iii)** Details about study context (model-based prevention studies) (alphabetically sorted)

| <b>Authors</b> | <b>Year</b> | <b>Country</b> | <b>Study design</b> | <b>Setting</b> | <b>Target population/<br/>age group</b>          | <b>N<br/>(analytical sample)</b>                   | <b>Parents/<br/>guardians included</b> | <b>Intervention overview<br/>/target</b>                                                | <b>Intervention aim<br/>/mode of delivery</b> | <b>Comparator</b> |
|----------------|-------------|----------------|---------------------|----------------|--------------------------------------------------|----------------------------------------------------|----------------------------------------|-----------------------------------------------------------------------------------------|-----------------------------------------------|-------------------|
| Barrett et al. | 2015        | USA            | Cohort              | State's school | 6–11 years, boys/girls from a mixed-weight group | 17.6 million children                              | No                                     | Active physical education policy (Active PE)                                            | Prevention (policy) /teachers                 | Usual care        |
| Brown et al.   | 2007        | USA            | Cohort              | School         | 8-11 years, Boys/girls from a mixed-weight group | 423 children                                       | No                                     | Physical education, school food service modification, family- and home-based program    | Prevention /teacher, trainer                  | Usual care        |
| Carter et al.  | 2009        | Australia      | RCT                 | School         | 7–11 years, boys/girls from a mixed-weight group | 595, 000 children over 5 years (119,000 each year) | Yes: Parents involved but not costed   | Education programme to reduce sugar sweetened drink consumption                         | Prevention /trained project staff             | Usual care        |
| Carter et al.  | 2009        | Australia      | Cohort              | School         | 6 years, boys/girls from a mixed-weight group    | 114, 630 children                                  | Yes: Parents involved but not costed   | Education to improve nutrition and physical activity, with an active physical education | Prevention /teacher                           | Usual care        |

**Table S1 (iii)** Details about study context (model-based prevention studies) (alphabetically sorted) continued

|                 |      |           |        |        |                                                   |                      |                                      |                                                                                            |                                           |            |
|-----------------|------|-----------|--------|--------|---------------------------------------------------|----------------------|--------------------------------------|--------------------------------------------------------------------------------------------|-------------------------------------------|------------|
| Carter et al.   | 2009 | Australia | RCT    | School | 8–10 years, boys/girls from a mixed-weight group  | 268, 600 children    | Yes: parents involved but not costed | Education programme to reduce television viewing of snacks                                 | Prevention /teacher                       | Usual care |
| Carter et al.   | 2009 | Australia | Cohort | School | 6 years, boys/girls from a mixed-weight group     | 114, 630 children    | Yes: parents involved but not costed | Education to improve nutrition and physical activity, without an active physical education | Prevention /teacher                       | Usual care |
| Graziose et al. | 2016 | USA       | RCT    | School | 10-11 years, boys/girls from a mixed-weight group | 769 children         | No                                   | 24 lessons, obesity prevention nutrition education                                         | Prevention /trained teacher               | Usual care |
| Long et al.     | 2015 | USA       | Cohort | State  | 2-19 years, boys/girls from a mixed-weight group  | 74 million children  | No                                   | Sugar-sweetened beverage excise tax/diet                                                   | Prevention (policy) /government, industry | Usual care |
| Magnus et al.   | 2009 | Australia | RCT    | State  | 5-14 years, boys/girls from a mixed-weight group  | 2.4 million children | Yes: parents involved but not costed | Removing TV advertising of energy-dense nutrition-poor (EDNP) food and beverages,          | Prevention (policy) /media                | Usual care |

**Table S1 (iii)** Details about study context (model-based prevention studies) (alphabetically sorted) continued

|                |      |             |                     |                      |                                                                |                                          |                                                    |                                                                                |                                  |                     |
|----------------|------|-------------|---------------------|----------------------|----------------------------------------------------------------|------------------------------------------|----------------------------------------------------|--------------------------------------------------------------------------------|----------------------------------|---------------------|
| Moodie et al.  | 2009 | Australia   | Cohort              | School-community     | 5-7 years, boys/girls from a mixed-weight group                | 7, 840 children                          | Yes                                                | Walking school bus program, encouraging physical activity                      | Prevention /volunteer conductors | Usual care          |
| Moodie et al.  | 2010 | Australia   | Cohort              | School (after hours) | 5-11 years, boys/girls from a mixed-weight group               | 99, 000 children                         | Yes                                                | Active after-school communities, physical activity                             | Prevention /organizations        | Usual care          |
| Moodie et al.  | 2011 | Australia   | Cohort              | School-community     | 10–11 years, boys/girls from a mixed-weight group              | 267, 700 children                        | Yes: parents involved but not costed               | Travel smart school, promotion of physical activity                            | Prevention /teachers             | Usual care          |
| Moodie et al.  | 2013 | Australia   | Quasi-experimental, | School-community     | 4-12 years, boys/girls from a mixed-weight group               | 2, 184 children                          | Yes                                                | The be active eat well program, diet and physical activity                     | Prevention /community service    | Usual care          |
| Pringle et al. | 2010 | UK          | –                   | Community            | 10-17 years, boys/girls from a mixed-weight group              | 343 children and adolescents             | Yes: Not for indirect and direct non-medical costs | Free swimming activities, campaigns, exercise classes, motivational interviews | Prevention /trainer              | Other interventions |
| Rush et al.    | 2014 | New Zealand | RCT                 | School               | 6-8 years and 9-11 years, boys/girls from a mixed-weight group | 2, 474 younger and 2, 330 older children | Yes: parents involved but not costed               | Project Energize: Multicomponent physical activity and nutrition               | Prevention /organizations        | Usual care          |

**Table S1 (iii)** Details about study context (model-based prevention studies) (alphabetically sorted) continued

|                   |      |     |        |        |                                                   |                                     |    |                                                                                                                          |                                          |            |
|-------------------|------|-----|--------|--------|---------------------------------------------------|-------------------------------------|----|--------------------------------------------------------------------------------------------------------------------------|------------------------------------------|------------|
| Sonneville et al. | 2015 | USA | Cohort | State  | 2-19 years, boys/girls from a mixed-weight group  | 74 million Children and adolescents | No | Elimination of the tax subsidy of TV advertising costs for nutritionally poor foods and beverages advertised             | Prevention (policy) /industry            | Usual care |
| Wang et al.       | 2003 | USA | RCT    | School | 10-14 years, girls from a mixed-weight group      | 620 children                        | No | Lessons, sport materials, wellness, teacher training, targeting diet and physical activity, reduction of TV viewing time | Prevention/ teacher, trainer             | Usual care |
| Wang et al.       | 2011 | USA | RCT    | School | 10-14 years, girls from a mixed-weight group      | 480 children                        | No | Lessons, sport materials, wellness, teacher training, targeting diet and physical activity                               | Prevention/ teacher, trainer             | Usual care |
| Wright et al.     | 2015 | USA | Cohort | State  | 2.5-5 years, boys/girls from a mixed-weight group | 3.7 million children                | No | Early care and education policy change, physical activity, diet and reduction of TV viewing time                         | Prevention (policy) /Child care trainers | Usual care |

**Notes:** RCT = randomised controlled trial

**Table S1 (iv)** Details about study context (model-based treatment studies) (alphabetically sorted)

| Authors             | Year | Country   | Study design | Setting            | Target population/<br>age group                               | N<br>(analytical sample)                         | Parents/<br>guardians included       | Intervention overview<br>/target                                                              | Intervention aim<br>/mode of delivery                               | Comparator                         |
|---------------------|------|-----------|--------------|--------------------|---------------------------------------------------------------|--------------------------------------------------|--------------------------------------|-----------------------------------------------------------------------------------------------|---------------------------------------------------------------------|------------------------------------|
| Carter et al.       | 2009 | Australia | Cohort       | School             | 7–10 years, boys/girls with obesity/overweight                | 17, 000 children over 4 years, (4 200 each year) | Yes: Parents involved but not costed | Multifaceted targeted programme, diet and physical activity                                   | Treatment/teacher                                                   | Usual care                         |
| Carter et al.       | 2009 | Australia | RCT          | Primary Care       | 10–11 years, boys/girls with obesity                          | 5, 800 children                                  | Yes: Parents involved but not costed | Primary care-based program, children with obesity and their parents, diet                     | Treatment/GPs, paediatricians, psychologists, dietitians            | Usual care                         |
| Hollingworth et al. | 2012 | UK        | RCT          | Hospital-community | 4-5 years and 10-11 years, boys/girls with obesity/overweight | 9, 956 younger and 9, 698 older children         | Yes: Parents involved but not costed | Interventions aimed at modifying behaviour, diet and/or physical activity                     | Treatment/GP, paediatricians, nurse, exercise specialist, dietitian | Usual care or minimal intervention |
| Moodie et al.       | 2008 | Australia | RCT          | Primary Care       | 5–9 years, boys/girls with obesity/overweight                 | 9, 685 children                                  | Yes                                  | Training of GP (3 times 2.5 h), 4 consultations over a 12-week period/physical activity, diet | Treatment/GP                                                        | Usual care                         |

**Notes:** GP = general practitioner; RCT = randomised controlled trial

**Tables S2-4 (i) – S2-4 (iv):** Data extraction (Detailed account of the economic evaluation methods)

**Table S2 (i)** Detailed account of the economic evaluation methods A (trial-based prevention studies) (alphabetically sorted)

| Authors and year       | Measures of effectiveness/<br>study type                                                                    | Type of modelling approach | Study perspective          | Duration of intervention/<br>follow-up                          | Time horizon | Price year    | Currency unit | Discount rate                        |
|------------------------|-------------------------------------------------------------------------------------------------------------|----------------------------|----------------------------|-----------------------------------------------------------------|--------------|---------------|---------------|--------------------------------------|
| Hayes et al. 2014      | Reduction in BMI (z-score), unit BMI avoided/CEA                                                            | N.A.                       | Health care funder         | 2 years/ 2 years after randomisation                            | 2 years      | 2012          | AU\$          | Costs: 5%<br>Effects: 5%             |
| Kesztys et al. 2011    | Reduction in BMI, cm WC and unit WHtR prevented/CEA                                                         | N.A.                       | Societal                   | 1 year/ 1 year after randomisation                              | 1 year       | 2008          | €             | N.A.                                 |
| Krauth et al. 2013     | Reduction in BMI, (increase in physical activity: the measure was not specified)/CCA                        | N.A.                       | Societal                   | 4 years/ 4, 5 and 6 years after intervention                    | 6 years      | No price year | €             | Not stated                           |
| Martinez et al. 2011   | Percent point decrease in triceps skinfold thickness and body fat/CEA                                       | N.A.                       | Societal and institutional | 8 months/ 8 months after randomisation                          | 8 months     | 2005          | €             | N.A.                                 |
| McAuley et al. 2010    | Reduction in BMI (z-score), cm WC prevented, weight gain prevented, HRQoL/CEA                               | N.A.                       | Societal                   | 2 years/ 2 and 4 years after intervention                       | 4 years      | 2006          | NZ\$          | Costs at 5%<br>Effects: Not reported |
| Meng et al. 2013       | Reduction in BMI, BMI (z-score), overweight and obesity case avoided/CEA                                    | N.A.                       | Societal                   | 1 year/ 1 year after randomisation                              | 1 year       | 2010          | RMB/<br>US\$  | N.A.                                 |
| Peterson et al. 2008   | (Increase in physical activity: the measure was not specified)/CEA                                          | N.A.                       | Not specified              | Not reported                                                    | Not reported | No price year | US\$          | N.A.                                 |
| Sutherland et al. 2016 | MVPA (min/day) gained, MET hours gained per person/day, BMI unit avoided and reduction in BMI (z-score)/CEA | N.A.                       | Societal                   | 2 years/ 1 year (mid-intervention), 2 years after randomisation | 2 years      | 2014          | AU\$          | Not stated                           |
| Wang et al. 2008       | Reduction in body fat/CEA                                                                                   | N.A.                       | Societal                   | 1 year/ 1 year after randomisation                              | 1 year       | 2003          | US\$          | N.A.                                 |

**Notes:** BMI = body mass index; CCA = cost-consequence analysis; CEA = Cost-effectiveness analysis; HRQoL = health-related quality of life; MVPA = moderate-to-vigorous physical activity; WC = waist circumference; WHtR = waist-to-height ratio; N.A. = not applicable

**Table S2 (ii)** Detailed account of the economic evaluation methods A (trial-based treatment studies) (alphabetically sorted)

| Authors and year         | Measures of effectiveness/<br>study type                                                                           | Type of modelling approach | Study perspective                       | Duration of intervention/<br>follow-up        | Time horizon | Price year    | Currency unit | Discount rate |
|--------------------------|--------------------------------------------------------------------------------------------------------------------|----------------------------|-----------------------------------------|-----------------------------------------------|--------------|---------------|---------------|---------------|
| Epstein et al. 2014      | BMI change and weight for children and parents/CEA                                                                 | N.A.                       | Societal (payer plus participant costs) | 1 year/ 1 year after randomisation            | 1 year       | No price year | US\$          | N.A.          |
| Goldfield et al. 2001    | Reduction in BMI (z-score) and percentage overweight/CEA                                                           | N.A.                       | Not specified                           | 6 months/ 6 and 12 months after randomisation | 1 year       | No price year | \$            | N.A.          |
| Hollinghurst et al. 2013 | Reduction in BMI sd/CEA                                                                                            | N.A.                       | Healthcare                              | 1 year/ 1 year after randomisation            | 1 year       | No price year | £             | N.A.          |
| Janicke et al. 2009      | Reduction in BMI/CEA                                                                                               | N.A.                       | Not specified                           | 4 months/ 4 and 10 months after randomisation | 10 months    | No price year | US\$          | N.A.          |
| Kalavainen et al. 2009   | Reduction in weight for height and BMI/CEA                                                                         | N.A.                       | Service provider (healthcare)           | 6 months/ 6 and 12 months after randomisation | 1 year       | 2004          | €             | N.A.          |
| Robertson et al. 2017    | Reduction in waist z-score, body fat, WC, MVPA (min/day) gained, change in BMI (z-score) and QALYs gained/CEA, CUA | N.A.                       | NHS and PSS (healthcare)                | 3 months/ 3 and 12 months after randomisation | 1 year       | 2013, 2014    | £             | N.A.          |
| Wake et al. 2008         | Reduction in BMI, parent-reported physical activity and dietary habits/CCA                                         | N.A.                       | Societal                                | 9 months/ 9 and 15 months after randomisation | 15 months    | 2003          | AU\$          | Not stated    |

**Notes:** BMI = body mass index; CCA = cost-consequence analysis; CEA = Cost-effectiveness analysis; CUA = cost-utility analysis; QALYs = quality-adjusted life years; MVPA = moderate-to-vigorous physical activity; NHS = National Health Service; PSS = personal social services; WC = waist circumference; N.A. = not applicable

**Table S2 (iii)** Detailed account of the economic evaluation methods A (model-based prevention studies) (alphabetically sorted)

| Authors and year                   | Measures of effectiveness/<br>study type                                                                          | Type of modelling approach | Study perspective | Duration of intervention/<br>follow-up | Time horizon                  | Price year | Currency unit | Discount rate            |
|------------------------------------|-------------------------------------------------------------------------------------------------------------------|----------------------------|-------------------|----------------------------------------|-------------------------------|------------|---------------|--------------------------|
| Barrett et al. 2015                | Reduction in BMI and obesity-related healthcare expenditure, increase in minutes of MVPA and MET-hours/CEA        | Markov model               | Societal          | 2 years/<br>2 years                    | 10 years                      | 2014       | US\$          | Costs: 3%<br>Effects: 3% |
| Brown et al. 2007                  | Cases of adult overweight prevented, QALYs saved/CUA                                                              | Decision analytic model    | Societal          | 3 years/                               | 25 years<br>From age 40 to 64 | 2004       | US\$          | Costs: 3%<br>Effects: 3% |
| Carter et al. 2009<br>(4 the same) | BMI unit saved, DALYs saved/CUA                                                                                   | Markov model               | Societal          | 1 year/                                | Lifetime                      | 2001       | AU\$          | Costs: 3%<br>Effects: 3% |
| Graziose et al. 2016               | Reduction in adult obesity, QALYs saved/CUA                                                                       | Decision analytic model    | Societal          | 1 year/                                | Lifetime                      | 2012       | US\$          | Costs: 3%<br>Effects: 3% |
| Long et al. 2015                   | Changes in BMI, reductions in disease burden and healthcare expenditures, DALYs averted and QALYs gained/CEA, CUA | Markov model               | Societal          | 2 years/<br>2 years                    | 10 years                      | 2014       | US\$          | Costs: 3%<br>Effects: 3% |
| Magnus et al. 2009                 | BMI unit saved, DALYs saved/CEA, CUA                                                                              | Markov model               | Societal          | 1 year/                                | Lifetime                      | 2001       | AU\$          | Costs: 3%<br>Effects: 3% |
| Moodie et al. 2009                 | BMI unit saved, DALYs saved, increase in physical activity (MET) and energy expenditure/CEA, CUA                  | Markov model               | Societal          | 1 year/                                | Lifetime                      | 2001       | AU\$          | Costs: 3%<br>Effects: 3% |
| Moodie et al. 2010                 | BMI unit saved, DALYs saved, increase in physical activity (MET) and energy expenditure/CEA, CUA                  | Markov model               | Societal          | 1 year/                                | Lifetime                      | 2001       | AU\$          | Costs: 3%<br>Effects: 3% |

**Table S2 (iii)** Detailed account of the economic evaluation methods A (model-based prevention studies) (alphabetically sorted) continued

|                        |                                                                                                   |                         |                                      |                     |                               |      |      |                              |
|------------------------|---------------------------------------------------------------------------------------------------|-------------------------|--------------------------------------|---------------------|-------------------------------|------|------|------------------------------|
| Moodie et al. 2011     | BMI unit saved, DALYs saved, increase in physical activity (MET) and energy expenditure/CEA, CUA  | Markov model            | Societal                             | 1 year/             | Lifetime                      | 2001 | AU\$ | Costs: 3%<br>Effects: 3%     |
| Moodie et al. 2013     | Reduction in BMI, DALYs saved/CEA, CUA                                                            | Markov model            | Societal                             | 3 years/            | Lifetime                      | 2006 | AU\$ | Costs: 3%<br>Effects: 3%     |
| Pringle et al. 2010    | Change in MPA, QALYs saved/CEA, CUA                                                               | Decision analytic model | Not specified                        | Not reported        | Not reported                  | 2003 | £    | N.A.                         |
| Rush et al. 2014       | Reduction in BMI, QALYs saved, increased life expectancy/CUA                                      | Markov model            | Health treatment payer (Health care) | 2 years/<br>5 years | Lifetime                      | 2011 | NZ\$ | Costs: 3.5%<br>Effects: 3.5% |
| Sonneville et al. 2015 | Reduction in BMI, reductions in disease burden, healthcare expenditures and QALYs gained/CEA, CUA | Markov model            | Societal                             | 2 years/<br>2 years | 10 years                      | 2014 | US\$ | Costs: 3%<br>Effects: 3%     |
| Wang et al. 2003       | Cases of adult overweight prevented, QALYs saved/CUA                                              | Decision analytic model | Societal                             | 2 years/            | 25 years<br>From age 40 to 65 | 1996 | US\$ | Costs: 3%<br>Effects: 3%     |
| Wang et al. 2011       | DWCB avoided, QALYs saved/CUA                                                                     | Decision analytic model | Societal                             | 2 years/            | 10 years                      | 2010 | US\$ | Costs: 3%<br>Effects: 3%     |
| Wright et al. 2015     | Unit BMI avoided, reduction in obesity-related healthcare expenditure/CEA                         | Markov model            | Societal                             | 2 years/<br>2 years | 10 years                      | 2014 | US\$ | Costs: 3%<br>Effects: 3%     |

**Notes:** BMI = body mass index; CEA = Cost-effectiveness analysis; DALYs = disability-adjusted life years; DWCB = disordered weight control behaviours; QALYs = quality-adjusted life years; MVPa = moderate-to-vigorous physical activity; MPA = moderate physical activity; N.A. = not applicable

**Table S2 (iv)** Detailed account of the economic evaluation methods A (model-based treatment studies) (alphabetically sorted)

| Authors and year                   | Measures of effectiveness/<br>study type     | Type of modelling approach | Study perspective   | Duration of intervention/<br>follow-up | Time horizon | Price year | Currency unit | Discount rate            |
|------------------------------------|----------------------------------------------|----------------------------|---------------------|----------------------------------------|--------------|------------|---------------|--------------------------|
| Carter et al. 2009<br>(2 the same) | BMI unit saved,<br>DALYs saved/CUA           | Markov model               | Societal            | 1 year/                                | Lifetime     | 2001       | AU\$          | Costs: 3%<br>Effects: 3% |
| Hollingworth et al. 2012           | Reduction in BMI sd,<br>life year gained/CEA | Markov model               | NHS<br>(healthcare) | 1 year/                                | Lifetime     | 2009       | £             | Costs: 3%<br>Effects: 3% |
| Moodie et al. 2008                 | BMI unit saved,<br>DALYs saved/CEA, CUA      | Markov model               | Societal            | 1 year/                                | Lifetime     | 2001       | AU\$          | Costs: 3%<br>Effects: 3% |

**Notes:** BMI = body mass index; CEA = Cost-effectiveness analysis; CUA = cost-utility analysis; DALYs = disability-adjusted life years; NHS = National Health Service; NHF = National Health Forum

**Table S3 (i)** Detailed account of the economic evaluation methods B (trial-based prevention studies) (alphabetically sorted)

| <b>Authors and year</b> | <b>Methods for estimating/collecting resource use</b>     | <b>Cost categories</b>                        | <b>Largest cost drivers</b>       | <b>Excluded costs</b>                                                                  | <b>Average costs per participant</b>                                                     | <b>Funding source</b> |
|-------------------------|-----------------------------------------------------------|-----------------------------------------------|-----------------------------------|----------------------------------------------------------------------------------------|------------------------------------------------------------------------------------------|-----------------------|
| Hayes et al. 2014       | Local health district records, patient-level data linkage | Programme delivery, direct medical            | Hospitalisation and doctor visits | Research and development, birth, evaluation or administration of the clinical trial    | AU\$ 1, 309                                                                              | Academic              |
| Keszyus et al. 2011     | Official statistics of the state of Bavaria               | Programme delivery                            | Scientific coordinator            | Development, scientific evaluation, classroom time                                     | € 24.09                                                                                  | Academic              |
| Krauth et al. 2013      | Questionnaire, school admin                               | Programme delivery, indirect                  | Training                          | Not stated                                                                             | € 619                                                                                    | Academic              |
| Martinez et al. 2011    | Not stated                                                | Programme delivery, labour                    | Personnel (coordinator)           | Parents' care costs                                                                    | € 269.83                                                                                 | Academic              |
| McAuley et al. 2010     | Not stated                                                | Programme delivery                            | coordinator                       | Research and development, planning phase, time costs of the children and their parents | NZ\$ 1, 281                                                                              | Academic              |
| Meng et al. 2013        | Not stated                                                | Programme delivery, labour, money, evaluation | Materials                         | Not stated                                                                             | Combined: RMB 182.4 (US\$ 26.8), nutrition: RMB 52.8 (US\$ 7.8), PA: RMB 52.3 (US\$ 7.7) | Academic              |

**Table S3 (i)** Detailed account of the economic evaluation methods B (trial-based prevention studies) (alphabetically sorted) continued

|                           |                                                                                                                      |                                                                                              |            |                                                                          |                                                                                                                |            |
|---------------------------|----------------------------------------------------------------------------------------------------------------------|----------------------------------------------------------------------------------------------|------------|--------------------------------------------------------------------------|----------------------------------------------------------------------------------------------------------------|------------|
| Peterson<br>et al. 2008   | Not stated                                                                                                           | Development,<br>media production<br>and placement                                            | Not stated | Not stated                                                               | Per person to<br>become more<br>active:<br>Individual<br>sections: US\$<br>5.11- 153.19<br>Whole:<br>US\$ 8.87 | Not stated |
| Sutherland<br>et al. 2016 | Using market rates, Australian<br>Bureau of Statistics, Industrial<br>Relations Commission of<br>NSW/project records | Programme delivery                                                                           | Consultant | Research and<br>development,<br>potential effects on<br>healthcare costs | AU\$ 394                                                                                                       | Academic   |
| Wang<br>et al. 2008       | Not stated                                                                                                           | Programme delivery,<br>usual after-school care<br>costs without<br>intervention,<br>indirect | Personnel  | Not stated                                                               | US\$ 956                                                                                                       | Academic   |

**Table S3 (ii)** Detailed account of the economic evaluation methods B (trial-based treatment studies) (alphabetically sorted)

| <b>Authors and year</b>  | <b>Methods for estimating/collecting resource use</b>             | <b>Cost categories</b>                                           | <b>Largest cost drivers</b> | <b>Excluded costs</b>                                                                        | <b>Average costs per participant</b>                                                                                            | <b>Funding source</b> |
|--------------------------|-------------------------------------------------------------------|------------------------------------------------------------------|-----------------------------|----------------------------------------------------------------------------------------------|---------------------------------------------------------------------------------------------------------------------------------|-----------------------|
| Epstein et al. 2014      | Tracking and recording by staff members, Google maps calculations | Programme delivery, direct medical, direct non-medical, indirect | Treatment time              | Recruitment                                                                                  | Cost per family:<br>FBT: US\$ 1, 448,<br>PC-1: US\$ 2, 260,<br>PC-2: US\$ 2, 124                                                | Academic              |
| Goldfield et al. 2001    | Not stated                                                        | Programme delivery, direct medical                               | Salary                      | Reduced cost of medical care, purchasing new clothes, time costs for being physically active | Cost per family:<br>group treatment:<br>US\$ 491<br>Mixed treatment:<br>US\$ 1, 390                                             | Academic              |
| Hollinghurst et al. 2013 | Patient-level data linkage                                        | Programme delivery, direct medical                               | Mandometer device           | Development of the Mandometer and staff training                                             | Mandometer group: £ 1, 749 (SD £ 243), primary care group: £ 301 (SD £76), hospital groups: £ 263 (SD £ 88) and £ 209 (SD £ 81) | Academic              |
| Janicke et al. 2009      | Not stated                                                        | Programme delivery, direct medical                               | Group leaders               | Research (assessment, recruitment), participants (travel, purchasing healthier foods)        | Family-based group: US\$ 872,<br>Parent-only: US\$ 521                                                                          | Academic              |

**Table S3 (ii)** Detailed account of the economic evaluation methods B (trial-based treatment studies) (alphabetically sorted) continued

|                        |                                                                                                      |                                                                  |                              |                                            |                                                                    |          |
|------------------------|------------------------------------------------------------------------------------------------------|------------------------------------------------------------------|------------------------------|--------------------------------------------|--------------------------------------------------------------------|----------|
| Kalavainen et al. 2009 | Not stated                                                                                           | Programme delivery, labour, direct medical                       | Labour                       | Research component, participating families | Cost per family: group treatment: € 327, routine counselling: € 61 | Academic |
| Robertson et al. 2017  | Questionnaire and secondary national tariff sets                                                     | Programme delivery, direct medical, indirect                     | Hospital visits, salary (GP) | Not stated                                 | £ 998                                                              | Academic |
| Wake et al. 2008       | 3 main sources: the LEAP team records, practice audit, and parent written questionnaires at 9 months | Programme delivery, direct medical, direct non-medical, indirect | Practice                     | Set-up, research and development, training | AU\$ 705                                                           | Academic |

**Table S3 (iii)** Detailed account of the economic evaluation methods B (model-based prevention studies) (alphabetically sorted)

| <b>Authors and year</b> | <b>Methods for estimating/collecting resource use</b>                                                         | <b>Cost categories</b>                                                           | <b>Largest cost drivers</b>                            | <b>Excluded costs</b>          | <b>Average costs per participant</b> | <b>Funding source</b> |
|-------------------------|---------------------------------------------------------------------------------------------------------------|----------------------------------------------------------------------------------|--------------------------------------------------------|--------------------------------|--------------------------------------|-----------------------|
| Barrett et al. 2015     | Beta, normal or uniform distribution form, different databases (school administrators, interventions, survey) | Programme delivery, avoided direct medical                                       | Sets (nationally) of active PE curricula and equipment | Start-up                       | US\$ 4.03                            | Academic              |
| Brown et al. 2007       | Not stated                                                                                                    | Programme delivery, avoided direct medical, avoided indirect (productivity loss) | Promotional                                            | Not stated                     | US\$ 104                             | Academic              |
| Carter et al. 2009      | Not stated                                                                                                    | Programme delivery                                                               | Not stated                                             | Set-up                         | AU\$ 28                              | Academic              |
| Carter et al. 2009      | Not stated                                                                                                    | Programme delivery                                                               | Not stated                                             | Set-up, Teacher classroom time | AU\$ 473                             | Academic              |
| Carter et al. 2009      | Not stated                                                                                                    | Programme delivery                                                               | Not stated                                             | Set-up, Teacher classroom time | AU\$ 103                             | Academic              |
| Carter et al. 2009      | Not stated                                                                                                    | Programme delivery                                                               | Not stated                                             | Set-up, Teacher classroom time | AU\$ 211                             | Academic              |
| Graziose et al. 2016    | New York City Department of Education (NYCDOE) and author estimate                                            | Programme delivery, future obesity-related medical, avoided direct medical       | Teacher preparation time                               | Development and evaluation     | US\$ 111                             | Academic              |

**Table S3 (iii)** Detailed account of the economic evaluation methods B (model-based prevention studies) (alphabetically sorted) continued

|                     |                                                                                                                                      |                                                                  |                                      |                                                                                                                   |             |          |
|---------------------|--------------------------------------------------------------------------------------------------------------------------------------|------------------------------------------------------------------|--------------------------------------|-------------------------------------------------------------------------------------------------------------------|-------------|----------|
| Long et al. 2015    | Beta, normal or uniform distribution form, different databases (interventions, revenue department, bureau of labour statistics 2013) | Programme delivery, labour, avoided direct medical               | Industry auditor salary              | Not stated                                                                                                        | US\$ 0.68   | Academic |
| Magnus et al. 2009  | Not stated                                                                                                                           | Programme delivery, other sectors                                | Government regulators                | Set-up                                                                                                            | AU\$ 0.54   | Academic |
| Moodie et al. 2009  | Middle of Australian public service Level 6, Australian bureau of statistics and Victorian department of education and training      | Programme delivery, direct non-medical, indirect, other sectors, | Education e.g. programme coordinator | Set-up, research and development implementation                                                                   | AU\$ 2, 908 | Academic |
| Moodie et al. 2010  | Middle of Australian public service level 6 and Victorian department of education and training                                       | Programme delivery, indirect, other sectors                      | Sport and recreation                 | Set-up, research and development, implementation, external evaluation and maintenance                             | AU\$ 488.5  | Academic |
| Moodie et al. 2011  | Middle of Australian public service level 6, Victorian department of education and training                                          | Programme delivery, other sectors                                | Education e.g. Central coordinator   | Set-up, research and development                                                                                  | AU\$ 49.68  | Academic |
| Moodie et al. 2013  | Australian bureau of statistics, Victorian department of education and training, etc.                                                | Programme delivery, direct non-medical, indirect, other sectors  | Personnel time                       | Student time, spin-off activities, changes in the physical activity and eating patterns of participating families | AU\$ 344    | Academic |
| Pringle et al. 2010 | Not stated                                                                                                                           | Programme delivery,                                              | Primary care referral                | Not stated                                                                                                        | —           | Academic |

**Table S3 (iii)** Detailed account of the economic evaluation methods B (model-based prevention studies) (alphabetically sorted) continued

|                           |                                                                                                     |                                                                                           |                             |                                                           |             |          |
|---------------------------|-----------------------------------------------------------------------------------------------------|-------------------------------------------------------------------------------------------|-----------------------------|-----------------------------------------------------------|-------------|----------|
| Rush<br>et al. 2014       | Not stated                                                                                          | Programme delivery,<br>avoided direct medical                                             | Not stated                  | Set-up and<br>development,<br>indirect,<br>out-of-pocket, | NZ\$ 44.96  | Academic |
| Sonneville<br>et al. 2015 | Normal or beta distribution form,<br>different databases (bureau of labour<br>statistics 2013, etc) | Programme delivery,<br>labour,<br>avoided direct medical                                  | Industry auditor salary     | Not stated                                                | US\$ 0.015  | Academic |
| Wang<br>et al. 2003       | Not stated                                                                                          | Programme delivery,<br>avoided direct medical,<br>avoided indirect<br>(productivity loss) | Subject teachers            | Classroom time                                            | US\$ 28     | Academic |
| Wang<br>et al. 2011       | Not stated                                                                                          | Programme delivery,<br>avoided direct medical                                             | Subject teachers            | Not stated                                                | US\$ 184.27 | Academic |
| Wright<br>et al. 2015     | Different databases (bureau<br>of labour statistics 2013, etc)                                      | Programme delivery,<br>avoided direct medical                                             | Supervising and<br>training | Not stated                                                | US\$ 1.29   | Academic |

**Table S3 (iv)** Detailed account of the economic evaluation methods B (model-based treatment studies) (alphabetically sorted)

| <b>Authors and year</b>  | <b>Methods for estimating/collecting resource use</b>         | <b>Cost categories</b>                                           | <b>Largest cost drivers</b> | <b>Excluded costs</b>                                                    | <b>Average costs per participant</b> | <b>Funding source</b> |
|--------------------------|---------------------------------------------------------------|------------------------------------------------------------------|-----------------------------|--------------------------------------------------------------------------|--------------------------------------|-----------------------|
| Carter et al. 2009       | Not stated                                                    | Programme delivery                                               | Not stated                  | Set-up                                                                   | AU\$ 129                             | Academic              |
| Carter et al. 2009       | Not stated                                                    | Programme delivery                                               | Not stated                  | Set-up,                                                                  | AU\$ 1,896                           | Academic              |
| Hollingworth et al. 2012 | Not stated                                                    | Programme delivery, lifetime treatment, obesity-related diseases | Salary (GP)                 | Not stated                                                               | £108 - 662                           | Academic              |
| Moodie et al. 2008       | Middle of Australian public service Level 6, LEAP trial, etc. | Programme delivery, direct medical, direct non-medical, indirect | Project coordinator         | Set-up, research and development, resultant changes in patient behaviour | AU\$ 650.5                           | Academic              |

**Table S4 (i)** Detailed account of the economic evaluation methods C (trial-based prevention studies) (alphabetically sorted)

| Authors and year     | ICER/average cost per benefit                                                                                                                                                                     | Uncertainty analysis | Sensitivity analysis type | Sensitivity analysis                                                                                                  | Cost-effective |
|----------------------|---------------------------------------------------------------------------------------------------------------------------------------------------------------------------------------------------|----------------------|---------------------------|-----------------------------------------------------------------------------------------------------------------------|----------------|
| Hayes et al. 2014    | AU\$ 4, 230 per unit BMI avoided,<br>AU\$ 631 per 0.1 reduction in BMI (z-score)                                                                                                                  | –                    | DSA                       | Adjustments in nurse travel time                                                                                      | Likely to be   |
| Kesztys et al. 2011  | € 11.11 per WC cm prevented<br>€ 18.55 per WHtR unit prevented                                                                                                                                    | –                    | DSA                       | Teachers individual working time to prepare the lessons, difference in effects tested at a 10, 20 and 30% lower value | Likely to be   |
| Krauth et al. 2013   | N.A.                                                                                                                                                                                              | –                    | DSA                       | –                                                                                                                     | N.A.           |
| Martinez et al. 2011 | ICER: No<br>€ 500 per 1% decrease in triceps skinfold thickness                                                                                                                                   | –                    | DSA                       | Differences in costs (modification of the venue cost)                                                                 | Likely to be   |
| McAuley et al. 2010  | ICER: No<br>NZ\$ 664–1708 per kg of weight gain prevented (depending on age),                                                                                                                     | –                    | DSA                       | Differences in weight z-score (ranged from 0.5 to 1.0 in the youngest children and 1.4 to 2.4 in the oldest children) | Likely to be   |
| Meng et al. 2013     | Combined intervention:<br>US\$ 120.3 per 1 kg/m <sup>2</sup> BMI reduction,<br>US\$ 249.3 per BMI z-score (BAZ),<br>US\$ 1308.9 per one overweight and obesity case avoided                       | –                    | Not stated                | N.A.                                                                                                                  | Likely to be   |
| Peterson et al. 2008 | ICER: No<br>Entire campaign:<br>US\$ 4.01: to see the ad,<br>US\$ 7.35: to consider being more active,<br>US\$ 8.87: actually become more active,<br>with bill-boards the most cost-effectiveness | –                    | Not stated                | N.A.                                                                                                                  | Likely to be   |

**Table S4 (i)** Detailed account of the economic evaluation methods C (trial-based prevention studies) (alphabetically sorted) continued

|                        |                                                                                                                                                                             |   |     |                                                                                                                                                                                                                                                                                                                                                                                        |              |
|------------------------|-----------------------------------------------------------------------------------------------------------------------------------------------------------------------------|---|-----|----------------------------------------------------------------------------------------------------------------------------------------------------------------------------------------------------------------------------------------------------------------------------------------------------------------------------------------------------------------------------------------|--------------|
| Sutherland et al. 2016 | AU\$ 56 per additional minute of MVPA,<br>AU\$ 1 per MET hour gained per person per day,<br>AU\$ 1, 408 per BMI unit avoided,<br>AU\$ 563 per 10 % reduction in BMI z-score | – | DSA | Higher and lower estimate of the assumed opportunity cost, varying the magnitude of the effect size, extending the benefit of physical activity recess and lunchtime activities to students beyond the target year, extending the benefit of multiple strategies to all students<br>Scenario: State wide rollout (current model), state wide roll out – Alternative (real world) model | Likely to be |
| Wang et al. 2008       | US\$ 317 per 0.76% body fat reduction                                                                                                                                       | – | DSA | Changing the per capita usual after-school care costs (ranging from US\$ 5.00 to US\$ 10.00)                                                                                                                                                                                                                                                                                           | Likely to be |

**Notes:** BAZ = BMI (z-score); BMI = body mass index; DSA = deterministic sensitivity analysis; MVPA = moderate-to-vigorous physical activity; WC = waist circumference; WHtR = waist-to-height ratio; N.A. = not applicable

**Table S4 (ii)** Detailed account of the economic evaluation methods C (trial-based treatment studies) (alphabetically sorted)

| Authors and year         | ICER/average cost per benefit                                                                                                                                                                                                                         | Uncertainty analysis | Sensitivity analysis type | Sensitivity analysis                                                         | Cost-effective |
|--------------------------|-------------------------------------------------------------------------------------------------------------------------------------------------------------------------------------------------------------------------------------------------------|----------------------|---------------------------|------------------------------------------------------------------------------|----------------|
| Epstein et al. 2014      | ICER: No<br>Children:<br>FBT US\$ 209.17 per % over BMI,<br>PC1 US\$ 1, 036.50 per % over BMI,<br>PC2 US\$ 973.98 per % over BMI,<br>Parents:<br>FBT US\$ 132.97 per pound (lb),<br>PC1 US\$ 373.53 per pound (lb),<br>PC2 US\$ 351.00 per pound (lb) | —                    | Not stated                | N.A.                                                                         | Likely to be   |
| Goldfield et al. 2001    | ICER: No<br>US\$ 1, 000 per 10% overweight reduction<br>US\$ 1, 000 per 0.6 decrease in BMI z-score                                                                                                                                                   | —                    | Not stated                | N.A.                                                                         | Likely to be   |
| Hollinghurst et al. 2013 | £ 432 per 0.1 reduction in BMI sd                                                                                                                                                                                                                     | —                    | Not stated                | N.A.                                                                         | Likely to be   |
| Janicke et al. 2009      | ICER: No<br>Family-based group:<br>US\$ 758 per 0.10 decrease in BMI z-score,<br>Parent-only:<br>US\$ 579 per 0.10 decrease in BMI z-score                                                                                                            | —                    | Not stated                | N.A.                                                                         | Likely to be   |
| Kalavainen et al. 2009   | € 53 per 1% decrease in weight for height<br>€ 266 per 0.1 decrease in BMI                                                                                                                                                                            | —                    | DSA                       | Group treatment costs:<br>salaries of two group leaders<br>included in costs | Likely to be   |

**Table S4 (ii)** Detailed account of the economic evaluation methods C (trial-based treatment studies) (alphabetically sorted) continued

|                          |                                                                           |   |     |                                                                                                                                                                                                                |                |
|--------------------------|---------------------------------------------------------------------------|---|-----|----------------------------------------------------------------------------------------------------------------------------------------------------------------------------------------------------------------|----------------|
| Robertson<br>et al. 2017 | £ 552, 175 per QALY saved,<br>£ - 3, 935 per unit change in BMI (z-score) | – | DSA | ‘programme completers’:<br>families that participated in 5<br>or more sessions, multiple<br>imputation of all missing cost<br>and outcomes data, alternative<br>sources and inputs for EQ-5D<br>utility values | Unlikely to be |
| Wake<br>et al. 2008      | N.A.                                                                      | – | DSA | Baseline: Value of parents’<br>time, equal parent's time, unit<br>cost of GP visit, economies of<br>scale<br>Combinations:                                                                                     | N.A.           |

**Notes:** BMI = body mass index; DSA = deterministic sensitivity analysis; FBT = family-based behavioural treatment; QALYs = quality-adjusted life years; PC = parent and child; N.A. = not applicabl

**Table S4 (iii)** Detailed account of the economic evaluation methods C (model-based prevention studies) (alphabetically sorted)

| <b>Authors and year</b> | <b>ICER/average cost per benefit</b>                                                                                                               | <b>Uncertainty analysis</b> | <b>Sensitivity analysis type</b> | <b>Sensitivity analysis</b>                                                                                                                     | <b>Cost-effective</b> |
|-------------------------|----------------------------------------------------------------------------------------------------------------------------------------------------|-----------------------------|----------------------------------|-------------------------------------------------------------------------------------------------------------------------------------------------|-----------------------|
| Barrett et al. 2015     | US\$ 401 per unit BMI avoided: 2 years<br>US\$ 1, 720 per BMI unit reduced: 10 years<br>Reduction of healthcare costs by \$ 60.5 million: 10 years | PSA                         | DSA, PSA                         | Physical activity and BMI changes, more PE time, cost of intervention                                                                           | Likely to be          |
| Brown et al. 2007       | US\$ 900 per QALY saved                                                                                                                            | –                           | PSA                              | Both overall and Hispanics (Cases of adult overweight prevented, QALYs saved, medical costs averted, costs of lost labour productivity averted) | Likely to be          |
| Carter et al. 2009      | AU\$ 5, 000 per DALY saved                                                                                                                         | PSA                         | DSA, PSA                         | –                                                                                                                                               | Dominant              |
| Carter et al. 2009      | AU\$ 1, 800 per DALY saved                                                                                                                         | PSA                         | DSA, PSA                         | –                                                                                                                                               | Dominant              |
| Carter et al. 2009      | AU\$ 5, 100 per DALY saved                                                                                                                         | PSA                         | DSA, PSA                         | –                                                                                                                                               | Dominant              |
| Carter et al. 2009      | AU\$ 5, 600 per DALY saved                                                                                                                         | PSA                         | DSA, PSA                         | –                                                                                                                                               | Likely to be          |
| Graziose et al. 2016    | US\$ 275 per QALY saved                                                                                                                            | PSA                         | DSA, PSA                         | Relapse into adulthood, intervention is effective only for Hispanic and black students, intervention is effective only for male students        | Likely to be          |

**Table S4 (iii)** Detailed account of the economic evaluation methods C (model-based prevention studies) (alphabetically sorted) continued

|                        |                                                                                                    |     |            |                                                                                                                                                                                                           |                |
|------------------------|----------------------------------------------------------------------------------------------------|-----|------------|-----------------------------------------------------------------------------------------------------------------------------------------------------------------------------------------------------------|----------------|
| Long<br>et al. 2015    | US\$ 8.54 per unit BMI avoided: 2 years,                                                           | PSA | DSA, PSA   | Change in SSB consumption and BMI, cost of implementing SSB excise tax                                                                                                                                    | Dominant       |
| Magnus<br>et al. 2009  | AU\$ 5.00 per BMI unit saved,<br>AU\$ 3.70 per DALY saved                                          | PSA | DSA, PSA   | BMI and cost changes                                                                                                                                                                                      | Dominant       |
| Moodie<br>et al. 2009  | AU\$ 87, 000 per BMI unit saved,<br>AU\$ 760, 000 per DALY saved                                   | PSA | DSA, PSA   | Reduce costs, improve capacity utilisation and recruitment, increase participants receiving benefit, combine scenarios                                                                                    | Unlikely to be |
| Moodie<br>et al. 2010  | AU\$ 8, 200 per BMI unit saved,<br>AU\$ 82, 000 per DALY saved                                     | PSA | DSA, PSA   | Reduction in the number of sites and co-ordinators, application of the same wage rate to all site co-ordinators (school, OSHC), combination scenarios, all participants receive full intervention benefit | Unlikely to be |
| Moodie<br>et al. 2011  | AU\$ 13, 000 per BMI unit saved,<br>AU\$ 117, 000 per DALY saved                                   | PSA | DSA, PSA   | joint cost attribution across multiple objectives, broadening of the benefit to include other children in the school, exclusion of selected costs items                                                   | Unlikely to be |
| Moodie<br>et al. 2013  | AU\$ 576 per BMI unit saved,<br>AU\$ 29, 798 per DALY saved                                        | PSA | DSA, PSA   | Alternative decay of effect, if only 50% of children received the benefit                                                                                                                                 | Likely to be   |
| Pringle<br>et al. 2010 | ICER: No<br>£ 47 - 509 per QALY gained,<br>£ 260 - 2, 786 per completer improving at least one MPA | —   | Not stated | N.A.                                                                                                                                                                                                      | Dominant       |

**Table S4 (iii)** Detailed account of the economic evaluation methods C (model-based prevention studies) (alphabetically sorted) continued

|                           |                                                                                                         |     |          |                                                                                                                                                     |              |
|---------------------------|---------------------------------------------------------------------------------------------------------|-----|----------|-----------------------------------------------------------------------------------------------------------------------------------------------------|--------------|
| Rush<br>et al. 2014       | NZ\$ 24, 690 per QALY saved: older children<br>NZ\$ 30, 438 per QALY saved: younger children            | –   | DSA, PSA | Varied conditions for younger and older children (varying of the cost of intervention, BMI, the annual discount rate and the horizon of the model)  | Likely to be |
| Sonneville<br>et al. 2015 | US\$ 1.16 per unit BMI avoided: 2 years,                                                                | PSA | DSA, PSA | Differences in BMI associated with the number of fast food advertising messages seen, cost of intervention                                          | Dominant     |
| Wang<br>et al. 2003       | US\$ 4, 035 per QALY saved                                                                              | –   | DSA, PSA | Cases of adult overweight prevented, years of healthy life, annual discount rate, medical care costs averted, annual workdays lost averted          | Dominant     |
| Wang<br>et al. 2011       | US\$ 2, 966 per QALY saved                                                                              | PSA | DSA, PSA | Percentage of girls with DWCB who had SED, progression probability, long-term medical costs per BN patients, HRQoL of BN patients, time to recovery | Dominant     |
| Wright<br>et al. 2015     | US\$ 57.80 per BMI unit avoided: 2 years<br>Net healthcare cost savings of \$ 51.6 million:<br>10 years | PSA | DSA, PSA | Time spent in care, alternative policy adherence estimates and outcomes                                                                             | Dominant     |

**Notes:** BMI = body mass index; BN = Bulimia Nervosa; DALYs = disability-adjusted life years; DSA = deterministic sensitivity analysis; DWCB = disordered weight control behaviours; HRQoL = health-related quality of life; QALYs = quality-adjusted life years; MPA = moderate physical activity; PE = physical education; PSA = probabilistic sensitivity analysis; SED = sub-diagnostic eating disorders; SSB = sugar sweetened beverage; N.A. = not applicable

**Table S4 (iv)** Detailed account of the economic evaluation methods C (model-based treatment studies) (alphabetically sorted)

| Authors and year         | ICER/average cost per benefit                                         | Uncertainty analysis | Sensitivity analysis type | Sensitivity analysis                                                                                                                                            | Cost-effective |
|--------------------------|-----------------------------------------------------------------------|----------------------|---------------------------|-----------------------------------------------------------------------------------------------------------------------------------------------------------------|----------------|
| Carter et al. 2009       | AU\$ 3, 300 per DALY saved                                            | PSA                  | DSA, PSA                  | –                                                                                                                                                               | Dominant       |
| Carter et al. 2009       | AU\$ 1, 500 per DALY saved                                            | PSA                  | DSA, PSA                  | –                                                                                                                                                               | Dominant       |
| Hollingworth et al. 2012 | £ 400 per 0.13 reduction in BMI sd,<br>£ 13, 589 per life year gained | –                    | DSA                       | BMI sd (minimal, median, or maximal effect size) and intervention cost (low, moderate and high)                                                                 | Dominant       |
| Moodie et al. 2008       | AU\$ 4, 670 per DALY saved                                            | PSA                  | DSA, PSA                  | Full maintenance of the BMI benefit into adulthood/vs. half maintenance, outlier removal, delivery of intervention, (family attendance, etc), recruitment rates | Likely to be   |

**Notes:** BMI = body mass index; DALYs = disability-adjusted life years; DSA = deterministic sensitivity analysis; PSA = probabilistic sensitivity analysis

**Table S5:** Drummond checklist for critically appraising relevant studies

**Table S5** Drummond checklist

| Drummond checklist for assessing primary economic evaluations                                                                                 |  |  |  |  |
|-----------------------------------------------------------------------------------------------------------------------------------------------|--|--|--|--|
| <b>Study design</b>                                                                                                                           |  |  |  |  |
| 1 The research question is stated                                                                                                             |  |  |  |  |
| 2 The economic importance of the research question is stated                                                                                  |  |  |  |  |
| 3 The viewpoint (s) of the analysis are clearly stated and justified                                                                          |  |  |  |  |
| 4 The rationale for choosing alternative programmes or interventions compared is stated                                                       |  |  |  |  |
| 5 The alternatives being compared are clearly described                                                                                       |  |  |  |  |
| 6 The form of economic evaluation used is stated                                                                                              |  |  |  |  |
| 7 The choice of form of economic evaluation is justified in relation to the questions addressed                                               |  |  |  |  |
| <b>Data collection</b>                                                                                                                        |  |  |  |  |
| 8 The source (s) of effectiveness estimates used are stated                                                                                   |  |  |  |  |
| 9 Details of the design and results of effectiveness study are given (if based on a single study)                                             |  |  |  |  |
| 10 Details of the methods of synthesis or meta-analysis of estimates are given (if based on a synthesis of a number of effectiveness studies) |  |  |  |  |
| 11 The primary outcome measure (s) for the economic evaluation are clearly stated                                                             |  |  |  |  |
| 12 Methods to value benefits are stated                                                                                                       |  |  |  |  |
| 13 Details of the subjects from whom valuations were obtained were given                                                                      |  |  |  |  |
| 14 Productivity changes (if included) are reported separately                                                                                 |  |  |  |  |
| 15 The relevance of productivity changes to the study question is discussed                                                                   |  |  |  |  |
| 16 Quantities of resource use are reported separately from their unit costs                                                                   |  |  |  |  |
| 17 Methods for the estimation of quantities and unit costs are described                                                                      |  |  |  |  |
| 18 Currency and price data are recorded                                                                                                       |  |  |  |  |
| 19 Details of currency of price adjustments for inflation or currency conversion are given                                                    |  |  |  |  |
| 20 Details of any model used are given                                                                                                        |  |  |  |  |
| 21 The choice of model used and the key parameters on which it is based are justified                                                         |  |  |  |  |
| <b>Analysis and interpretation of results</b>                                                                                                 |  |  |  |  |

|                                                                                        |  |  |  |  |
|----------------------------------------------------------------------------------------|--|--|--|--|
| 22 Time horizon of costs and benefits is stated                                        |  |  |  |  |
| 23 The discount rate (s) is stated                                                     |  |  |  |  |
| 24 The choice of discount rate (s) is justified                                        |  |  |  |  |
| 25 An explanation is given if costs and benefits are not discounted                    |  |  |  |  |
| 26 Details of statistical tests and confidence intervals are given for stochastic data |  |  |  |  |
| 27 The approach to sensitivity analysis is given                                       |  |  |  |  |
| 28 The choice of variables for sensitivity analysis is justified                       |  |  |  |  |
| 29 The ranges over which the variables are varied are justified                        |  |  |  |  |
| 30 Relevant alternatives are compared                                                  |  |  |  |  |
| 31 Incremental analysis is reported                                                    |  |  |  |  |
| 32 Major outcomes are presented in a disaggregated as well as aggregated form          |  |  |  |  |
| 33 The answer to the study question is given                                           |  |  |  |  |
| 34 Conclusions follow from the data reported                                           |  |  |  |  |
| 35 Conclusions are accompanied by the appropriate caveats                              |  |  |  |  |

**Notes: Y= Yes; N=No; NC= Not clear; N.A. = Not applicable**

**Tables S6 (i) – S6 (iv):** Quality assessment of the included studies

**Table S6 (i)** Critically appraising trial-based prevention studies (alphabetically sorted)

| <b>Drummond<br/>Checklist</b>                 | <b>Hayes<br/>et al.<br/>2014</b> | <b>Keszyus<br/>et al.<br/>2011</b> | <b>Krauth<br/>et al.<br/>2013</b> | <b>Martinez<br/>et al.<br/>2011</b> | <b>McAuley<br/>et al.<br/>2010</b> | <b>Meng<br/>et al.<br/>2013</b> | <b>Peterson<br/>et al.<br/>2008</b> | <b>Sutherland<br/>et al.<br/>2016</b> | <b>Wang<br/>et al.<br/>2008</b> |
|-----------------------------------------------|----------------------------------|------------------------------------|-----------------------------------|-------------------------------------|------------------------------------|---------------------------------|-------------------------------------|---------------------------------------|---------------------------------|
| <b>Study design</b>                           |                                  |                                    |                                   |                                     |                                    |                                 |                                     |                                       |                                 |
| 1                                             | Y                                | Y                                  | Y                                 | Y                                   | Y                                  | Y                               | Y                                   | Y                                     | Y                               |
| 2                                             | Y                                | Y                                  | Y                                 | Y                                   | NC                                 | Y                               | NC                                  | Y                                     | NC                              |
| 3                                             | Y                                | Y                                  | Y                                 | Y                                   | Y                                  | Y                               | Y                                   | Y                                     | Y                               |
| 4                                             | Y                                | NC                                 | N                                 | NC                                  | N                                  | N                               | N                                   | NC                                    | N                               |
| 5                                             | Y                                | Y                                  | Y                                 | Y                                   | Y                                  | Y                               | NC                                  | Y                                     | Y                               |
| 6                                             | Y                                | Y                                  | Y                                 | Y                                   | Y                                  | Y                               | Y                                   | Y                                     | Y                               |
| 7                                             | Y                                | N                                  | N                                 | N                                   | Y                                  | NC                              | Y                                   | Y                                     | NC                              |
| <b>Data collection</b>                        |                                  |                                    |                                   |                                     |                                    |                                 |                                     |                                       |                                 |
| 8                                             | Y                                | Y                                  | Y                                 | Y                                   | Y                                  | Y                               | Y                                   | Y                                     | Y                               |
| 9                                             | Y                                | Y                                  | Y                                 | Y                                   | Y                                  | Y                               | NC                                  | Y                                     | Y                               |
| 10                                            | N.A.                             | N.A.                               | N.A.                              | N.A.                                | N.A.                               | N.A.                            | N.A.                                | N.A.                                  | N.A.                            |
| 11                                            | Y                                | Y                                  | Y                                 | Y                                   | Y                                  | Y                               | NC                                  | Y                                     | Y                               |
| 12                                            | N.A.                             | Y                                  | Y                                 | Y                                   | Y                                  | Y                               | N.A.                                | Y                                     | Y                               |
| 13                                            | N.A.                             | Y                                  | Y                                 | Y                                   | N                                  | Y                               | N.A.                                | Y                                     | N                               |
| 14                                            | N.A.                             | NC                                 | N                                 | NC                                  | N                                  | N                               | N.A.                                | NC                                    | N                               |
| 15                                            | N.A.                             | N                                  | N                                 | N                                   | N                                  | N                               | N.A.                                | N                                     | N                               |
| 16                                            | Y                                | Y                                  | NC                                | Y                                   | Y                                  | N                               | N                                   | Y                                     | Y                               |
| 17                                            | Y                                | Y                                  | NC                                | Y                                   | NC                                 | N                               | N                                   | Y                                     | NC                              |
| 18                                            | Y                                | Y                                  | NC                                | Y                                   | Y                                  | Y                               | NC                                  | Y                                     | Y                               |
| 19                                            | Y                                | N                                  | N.A.                              | N                                   | Y                                  | N                               | N                                   | N                                     | N                               |
| 20                                            | N.A.                             | N.A.                               | N.A.                              | N.A.                                | N.A.                               | N.A.                            | N.A.                                | N.A.                                  | N.A.                            |
| 21                                            | N.A.                             | N.A.                               | N.A.                              | N.A.                                | N.A.                               | N.A.                            | N.A.                                | N.A.                                  | N.A.                            |
| <b>Analysis and interpretation of results</b> |                                  |                                    |                                   |                                     |                                    |                                 |                                     |                                       |                                 |
| 22                                            | Y                                | Y                                  | Y                                 | Y                                   | Y                                  | Y                               | N                                   | Y                                     | Y                               |
| 23                                            | Y                                | N.A.                               | N.A.                              | N.A.                                | NC                                 | N.A.                            | N.A.                                | N                                     | N.A.                            |
| 24                                            | Y                                | N.A.                               | N.A.                              | N.A.                                | NC                                 | N.A.                            | N.A.                                | N.A.                                  | N.A.                            |
| 25                                            | N.A.                             | N.A.                               | N.A.                              | N.A.                                | N                                  | N.A.                            | N.A.                                | N                                     | N.A.                            |

|    |   |   |      |    |    |      |      |   |    |
|----|---|---|------|----|----|------|------|---|----|
| 26 | Y | Y | N    | NC | Y  | Y    | N    | Y | NC |
| 27 | Y | Y | Y    | Y  | Y  | N    | N    | Y | Y  |
| 28 | Y | N | N    | N  | NC | N.A. | N.A. | Y | NC |
| 29 | Y | N | N    | N  | NC | N.A. | N.A. | Y | NC |
| 30 | Y | Y | N    | Y  | Y  | N.A. | N.A. | Y | Y  |
| 31 | Y | Y | N.A. | N  | N  | Y    | N    | Y | Y  |
| 32 | Y | Y | N.A. | N  | N  | Y    | N    | Y | Y  |
| 33 | Y | Y | Y    | Y  | Y  | Y    | Y    | Y | Y  |
| 34 | Y | Y | Y    | Y  | Y  | Y    | Y    | Y | Y  |
| 35 | Y | Y | Y    | Y  | Y  | Y    | NC   | Y | Y  |

**Notes: Y= Yes; N=No; NC= Not clear; N.A. = Not applicable**

**Table S6 (ii)** Critically appraising trial-based treatment studies (alphabetically sorted)

| <b>Drummond Checklist</b>                     | <b>Epstein et al. 2014</b> | <b>Goldfield et al. 2001</b> | <b>Hollinghurst et al. 2013</b> | <b>Janicke et al. 2009</b> | <b>Kalavainen et al. 2009</b> | <b>Robertson et al. 2017</b> | <b>Wake et al. 2008</b> |
|-----------------------------------------------|----------------------------|------------------------------|---------------------------------|----------------------------|-------------------------------|------------------------------|-------------------------|
| <b>Study design</b>                           |                            |                              |                                 |                            |                               |                              |                         |
| 1                                             | Y                          | Y                            | Y                               | P                          | Y                             | Y                            | Y                       |
| 2                                             | Y                          | NC                           | Y                               | Y                          | Y                             | Y                            | Y                       |
| 3                                             | Y                          | Y                            | Y                               | Y                          | Y                             | Y                            | Y                       |
| 4                                             | Y                          | N                            | N                               | N                          | N                             | NC                           | N                       |
| 5                                             | Y                          | Y                            | Y                               | Y                          | Y                             | Y                            | NC                      |
| 6                                             | Y                          | Y                            | Y                               | Y                          | Y                             | Y                            | Y                       |
| 7                                             | NC                         | N                            | NC                              | N                          | Y                             | NC                           | Y                       |
| <b>Data collection</b>                        |                            |                              |                                 |                            |                               |                              |                         |
| 8                                             | Y                          | Y                            | Y                               | Y                          | Y                             | Y                            | Y                       |
| 9                                             | Y                          | Y                            | Y                               | Y                          | Y                             | Y                            | Y                       |
| 10                                            | N.A.                       | N.A.                         | N.A.                            | N.A.                       | N.A.                          | N.A.                         | N.A.                    |
| 11                                            | Y                          | Y                            | Y                               | Y                          | Y                             | Y                            | Y                       |
| 12                                            | Y                          | N.A.                         | N.A.                            | N.A.                       | N.A.                          | N.A.                         | Y                       |
| 13                                            | Y                          | N.A.                         | N.A.                            | N.A.                       | N.A.                          | N.A.                         | NC                      |
| 14                                            | NC                         | N.A.                         | N.A.                            | N.A.                       | N.A.                          | N.A.                         | NC                      |
| 15                                            | N                          | N.A.                         | N.A.                            | N.A.                       | N.A.                          | N.A.                         | N                       |
| 16                                            | N                          | NC                           | Y                               | Y                          | Y                             | NC                           | NC                      |
| 17                                            | N                          | N                            | Y                               | N                          | N                             | Y                            | NC                      |
| 18                                            | NC                         | NC                           | NC                              | NC                         | Y                             | Y                            | Y                       |
| 19                                            | N                          | N                            | N                               | N                          | N                             | Y                            | N.A.                    |
| 20                                            | N.A.                       | N.A.                         | N.A.                            | N.A.                       | N.A.                          | N.A.                         | N.A.                    |
| 21                                            | N.A.                       | N.A.                         | N.A.                            | N.A.                       | N.A.                          | N.A.                         | N.A.                    |
| <b>Analysis and interpretation of results</b> |                            |                              |                                 |                            |                               |                              |                         |
| 22                                            | Y                          | Y                            | Y                               | Y                          | Y                             | Y                            | Y                       |
| 23                                            | N.A.                       | N.A.                         | N.A.                            | N.A.                       | N.A.                          | N.A.                         | N.A.                    |
| 24                                            | N.A.                       | N.A.                         | N.A.                            | N.A.                       | N.A.                          | N.A.                         | N.A.                    |
| 25                                            | N.A.                       | N.A.                         | N.A.                            | N.A.                       | N.A.                          | N.A.                         | N.A.                    |

|    |      |      |      |      |    |   |      |
|----|------|------|------|------|----|---|------|
| 26 | Y    | Y    | NC   | NC   | Y  | Y | NC   |
| 27 | N    | N    | N    | N    | Y  | Y | Y    |
| 28 | N.A. | N.A. | N.A. | N.A. | NC | Y | Y    |
| 29 | N.A. | N.A. | N.A. | N.A. | NC | Y | Y    |
| 30 | N.A. | N.A. | N.A. | N.A. | Y  | Y | Y    |
| 31 | N    | N    | Y    | N    | Y  | Y | N.A. |
| 32 | N    | N    | Y    | N    | Y  | Y | N.A. |
| 33 | Y    | Y    | Y    | Y    | Y  | Y | Y    |
| 34 | Y    | Y    | Y    | Y    | Y  | Y | Y    |
| 35 | Y    | Y    | Y    | Y    | Y  | Y | Y    |

---

**Notes: Y= Yes; N=No; NC= Not clear; N.A. = Not applicable**

**Table S6 (iii)** Critically appraising model-based prevention studies (alphabetically sorted)

| <b>Drummond Checklist</b>                     | <b>Barrett et al. 2015</b> | <b>Brown et al. 2007</b> | <b>Carter et al. 2009</b> | <b>Graziose et al. 2016</b> | <b>Long et al. 2015</b> | <b>Magnus et al. 2009</b> | <b>Moodie et al. 2009</b> | <b>Moodie et al. 2010</b> |
|-----------------------------------------------|----------------------------|--------------------------|---------------------------|-----------------------------|-------------------------|---------------------------|---------------------------|---------------------------|
| <b>Study design</b>                           |                            |                          |                           |                             |                         |                           |                           |                           |
| 1                                             | Y                          | Y                        | Y                         | Y                           | Y                       | Y                         | Y                         | Y                         |
| 2                                             | Y                          | NC                       | NC                        | Y                           | Y                       | Y                         | Y                         | N                         |
| 3                                             | Y                          | Y                        | Y                         | Y                           | Y                       | Y                         | Y                         | Y                         |
| 4                                             | N                          | N                        | N                         | Y                           | N                       | N                         | N                         | Y                         |
| 5                                             | Y                          | Y                        | Y                         | Y                           | Y                       | Y                         | Y                         | Y                         |
| 6                                             | Y                          | Y                        | Y                         | Y                           | Y                       | Y                         | Y                         | Y                         |
| 7                                             | NC                         | N                        | Y                         | Y                           | NC                      | N                         | N                         | N                         |
| <b>Data collection</b>                        |                            |                          |                           |                             |                         |                           |                           |                           |
| 8                                             | Y                          | Y                        | Y                         | Y                           | Y                       | Y                         | Y                         | Y                         |
| 9                                             | Y                          | Y                        | Y                         | Y                           | Y                       | Y                         | Y                         | Y                         |
| 10                                            | N.A.                       | N.A.                     | N.A.                      | N.A.                        | N.A.                    | N.A.                      | N.A.                      | N.A.                      |
| 11                                            | Y                          | Y                        | Y                         | Y                           | Y                       | Y                         | Y                         | Y                         |
| 12                                            | Y                          | Y                        | Y                         | Y                           | Y                       | Y                         | Y                         | Y                         |
| 13                                            | NC                         | NC                       | NC                        | NC                          | NC                      | N                         | NC                        | NC                        |
| 14                                            | N                          | NC                       | N                         | NC                          | N                       | N                         | NC                        | NC                        |
| 15                                            | N                          | N                        | N                         | N                           | N                       | N                         | N                         | N                         |
| 16                                            | Y                          | NC                       | N                         | Y                           | Y                       | N                         | Y                         | NC                        |
| 17                                            | Y                          | NC                       | N                         | Y                           | Y                       | N                         | Y                         | Y                         |
| 18                                            | Y                          | Y                        | Y                         | Y                           | Y                       | Y                         | Y                         | Y                         |
| 19                                            | N                          | N                        | Y                         | N                           | N                       | N                         | Y                         | Y                         |
| 20                                            | Y                          | NC                       | NC                        | Y                           | Y                       | NC                        | NC                        | NC                        |
| 21                                            | NC                         | N                        | N                         | N                           | NC                      | N                         | N                         | N                         |
| <b>Analysis and interpretation of results</b> |                            |                          |                           |                             |                         |                           |                           |                           |
| 22                                            | Y                          | Y                        | Y                         | Y                           | Y                       | Y                         | Y                         | Y                         |
| 23                                            | Y                          | Y                        | Y                         | Y                           | Y                       | Y                         | Y                         | Y                         |
| 24                                            | N                          | N                        | Y                         | Y                           | N                       | N                         | Y                         | Y                         |
| 25                                            | N.A.                       | N.A.                     | N.A.                      | N.A.                        | N.A.                    | N.A.                      | N.A.                      | N.A.                      |

|    |   |    |    |   |   |    |   |   |
|----|---|----|----|---|---|----|---|---|
| 26 | Y | NC | Y  | Y | Y | NC | Y | Y |
| 27 | Y | Y  | Y  | Y | Y | Y  | Y | Y |
| 28 | Y | Y  | N  | N | N | N  | Y | Y |
| 29 | Y | Y  | N  | N | N | N  | Y | Y |
| 30 | Y | Y  | N  | Y | Y | Y  | Y | Y |
| 31 | Y | Y  | Y  | Y | Y | Y  | Y | Y |
| 32 | Y | Y  | Y  | Y | Y | Y  | Y | Y |
| 33 | Y | NC | Y  | Y | Y | Y  | Y | Y |
| 34 | Y | Y  | Y  | Y | Y | Y  | Y | Y |
| 35 | Y | NC | NC | Y | Y | Y  | Y | Y |

---

**Notes: Y= Yes; N=No; NC= Not clear; N.A. = Not applicable**

**Table S6 (iii)** Critically appraising model-based prevention studies (alphabetically sorted) continued

| <b>Drummond<br/>Checklist</b>                 | <b>Moodie<br/>et al.<br/>2011</b> | <b>Moodie<br/>et al.<br/>2013</b> | <b>Pringle<br/>et al.<br/>2010</b> | <b>Rush<br/>et al.<br/>2014</b> | <b>Sonneville<br/>et al.<br/>2015</b> | <b>Wang<br/>et al.<br/>2003</b> | <b>Wang<br/>et al.<br/>2011</b> | <b>Wright<br/>et al.<br/>2015</b> |
|-----------------------------------------------|-----------------------------------|-----------------------------------|------------------------------------|---------------------------------|---------------------------------------|---------------------------------|---------------------------------|-----------------------------------|
| <b>Study design</b>                           |                                   |                                   |                                    |                                 |                                       |                                 |                                 |                                   |
| 1                                             | Y                                 | Y                                 | Y                                  | Y                               | Y                                     | Y                               | Y                               | Y                                 |
| 2                                             | N                                 | Y                                 | NC                                 | Y                               | Y                                     | NC                              | Y                               | Y                                 |
| 3                                             | Y                                 | Y                                 | Y                                  | Y                               | Y                                     | Y                               | Y                               | Y                                 |
| 4                                             | Y                                 | Y                                 | N                                  | NC                              | N                                     | N                               | N                               | N                                 |
| 5                                             | Y                                 | Y                                 | NC                                 | Y                               | Y                                     | Y                               | Y                               | Y                                 |
| 6                                             | Y                                 | Y                                 | Y                                  | Y                               | Y                                     | Y                               | Y                               | Y                                 |
| 7                                             | Y                                 | Y                                 | NC                                 | Y                               | NC                                    | NC                              | NC                              | NC                                |
| <b>Data collection</b>                        |                                   |                                   |                                    |                                 |                                       |                                 |                                 |                                   |
| 8                                             | Y                                 | Y                                 | Y                                  | Y                               | Y                                     | Y                               | Y                               | Y                                 |
| 9                                             | Y                                 | Y                                 | NC                                 | Y                               | Y                                     | Y                               | NC                              | Y                                 |
| 10                                            | N.A.                              | N.A.                              | N.A.                               | N.A.                            | N.A.                                  | N.A.                            | N.A.                            | N.A.                              |
| 11                                            | Y                                 | Y                                 | NC                                 | Y                               | Y                                     | Y                               | Y                               | Y                                 |
| 12                                            | Y                                 | Y                                 | N.A.                               | N.A.                            | Y                                     | Y                               | Y                               | Y                                 |
| 13                                            | NC                                | Y                                 | N.A.                               | N.A.                            | NC                                    | NC                              | NC                              | NC                                |
| 14                                            | NC                                | Y                                 | N.A.                               | N.A.                            | NC                                    | N                               | NC                              | N                                 |
| 15                                            | N                                 | Y                                 | N.A.                               | N.A.                            | N                                     | N                               | N                               | N                                 |
| 16                                            | Y                                 | Y                                 | NC                                 | N                               | Y                                     | Y                               | Y                               | Y                                 |
| 17                                            | Y                                 | Y                                 | NC                                 | NC                              | Y                                     | NC                              | NC                              | Y                                 |
| 18                                            | Y                                 | Y                                 | Y                                  | Y                               | Y                                     | Y                               | Y                               | Y                                 |
| 19                                            | Y                                 | Y                                 | N                                  | N                               | N                                     | N                               | N                               | N                                 |
| 20                                            | NC                                | NC                                | NC                                 | NC                              | Y                                     | Y                               | NC                              | Y                                 |
| 21                                            | N                                 | N                                 | N                                  | N                               | NC                                    | N                               | N                               | NC                                |
| <b>Analysis and interpretation of results</b> |                                   |                                   |                                    |                                 |                                       |                                 |                                 |                                   |
| 22                                            | Y                                 | Y                                 | N                                  | Y                               | Y                                     | Y                               | Y                               | Y                                 |
| 23                                            | Y                                 | Y                                 | N                                  | Y                               | Y                                     | Y                               | Y                               | Y                                 |
| 24                                            | Y                                 | Y                                 | N.A.                               | N                               | N                                     | N                               | N                               | N                                 |
| 25                                            | N.A.                              | N.A.                              | N                                  | N.A.                            | N.A.                                  | N.A.                            | N.A.                            | N.A.                              |

|    |   |    |      |    |   |    |    |   |
|----|---|----|------|----|---|----|----|---|
| 26 | Y | Y  | N    | Y  | Y | Y  | Y  | Y |
| 27 | Y | Y  | Y    | Y  | Y | Y  | Y  | Y |
| 28 | Y | NC | N    | NC | N | Y  | NC | Y |
| 29 | Y | NC | N    | NC | N | Y  | NC | Y |
| 30 | Y | Y  | N.A. | Y  | Y | Y  | Y  | Y |
| 31 | Y | Y  | N    | Y  | Y | Y  | Y  | Y |
| 32 | Y | Y  | N    | Y  | Y | Y  | Y  | Y |
| 33 | Y | Y  | NC   | Y  | Y | NC | Y  | Y |
| 34 | Y | Y  | Y    | Y  | Y | Y  | Y  | Y |
| 35 | Y | Y  | NC   | Y  | Y | Y  | Y  | Y |

---

**Notes: Y= Yes; N=No; NC= Not clear; N.A. = Not applicable**

**Table S6 (iv)** Critically appraising model-based treatment studies (alphabetically sorted)

| <b>Drummond<br/>Checklist</b>                 | <b>Carter<br/>et al.<br/>2009</b> | <b>Hollingworth<br/>et al.<br/>2012</b> | <b>Moodie<br/>et al.<br/>2008</b> |
|-----------------------------------------------|-----------------------------------|-----------------------------------------|-----------------------------------|
| <b>Study design</b>                           |                                   |                                         |                                   |
| 1                                             | Y                                 | Y                                       | Y                                 |
| 2                                             | NC                                | Y                                       | Y                                 |
| 3                                             | Y                                 | Y                                       | Y                                 |
| 4                                             | N                                 | N                                       | Y                                 |
| 5                                             | Y                                 | Y                                       | Y                                 |
| 6                                             | Y                                 | Y                                       | Y                                 |
| 7                                             | Y                                 | NC                                      | Y                                 |
| <b>Data collection</b>                        |                                   |                                         |                                   |
| 8                                             | Y                                 | Y                                       | Y                                 |
| 9                                             | Y                                 | Y                                       | Y                                 |
| 10                                            | N.A.                              | N.A.                                    | N.A.                              |
| 11                                            | Y                                 | Y                                       | Y                                 |
| 12                                            | Y                                 | N.A.                                    | Y                                 |
| 13                                            | NC                                | N.A.                                    | Y                                 |
| 14                                            | N                                 | N.A.                                    | Y                                 |
| 15                                            | N                                 | N.A.                                    | N                                 |
| 16                                            | N                                 | N                                       | Y                                 |
| 17                                            | N                                 | N                                       | Y                                 |
| 18                                            | Y                                 | Y                                       | Y                                 |
| 19                                            | Y                                 | N                                       | Y                                 |
| 20                                            | NC                                | NC                                      | NC                                |
| 21                                            | N                                 | NC                                      | N                                 |
| <b>Analysis and interpretation of results</b> |                                   |                                         |                                   |
| 22                                            | Y                                 | Y                                       | Y                                 |
| 23                                            | Y                                 | Y                                       | Y                                 |
| 24                                            | Y                                 | N                                       | Y                                 |
| 25                                            | N.A.                              | N.A.                                    | N.A.                              |

|    |    |    |   |
|----|----|----|---|
| 26 | Y  | NC | Y |
| 27 | Y  | Y  | Y |
| 28 | N  | N  | Y |
| 29 | N  | N  | Y |
| 30 | N  | Y  | Y |
| 31 | Y  | Y  | Y |
| 32 | Y  | Y  | Y |
| 33 | Y  | Y  | Y |
| 34 | Y  | Y  | Y |
| 35 | NC | Y  | Y |

---

**Notes: Y= Yes; N=No; NC= Not clear; N.A. = Not applicable**
